# Supplementary material for: Identification of biomarkers and construction of a microRNA-mRNA regulatory network for ependymoma using integrated bioinformatics analysis
Source: PubMed Central journal article supplement — Oncol Lett. 2019 Sep 30;18(6):6079–89. doi: 10.3892/ol.2019.10941 (PMC6865127; doi:10.3892/ol.2019.10941), 2019-09-30
Supplement: Supplementary_Data.pdf [file Supplementary_Data.pdf]

Figure S1. Boxplots of normalized samples in five datasets. (A) GSE25604, (B) GSE50161, (C) GSE66354, (D) GSE74195 and (E) GSE86574. The x-axes indicate samples, and the y-axes represent the expression of genes.

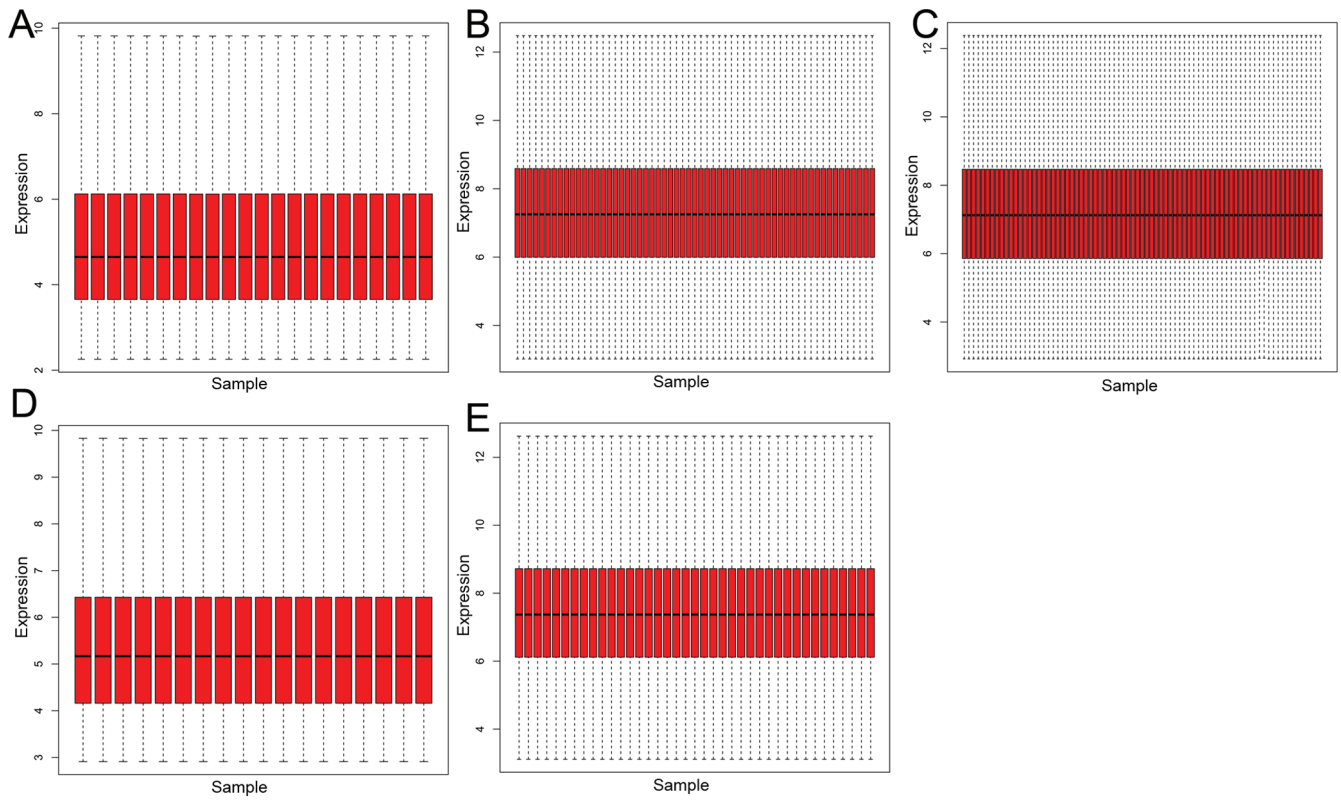

Figure S2. Volcano plots of DEGs in five datasets. (A) GSE25604, (B) GSE50161, (C) GSE66354, (D) GSE74195 and (E) GSE86574. Red nodes represent upregulated DEGs and green nodes indicate downregulated DEGs. Cut-off criteria were  $P < 0.05$  and  $|\log_2 FC| > 1$ . DEGs, differentially expressed genes; FC, fold change; adj.P.Val, adjusted P-value.

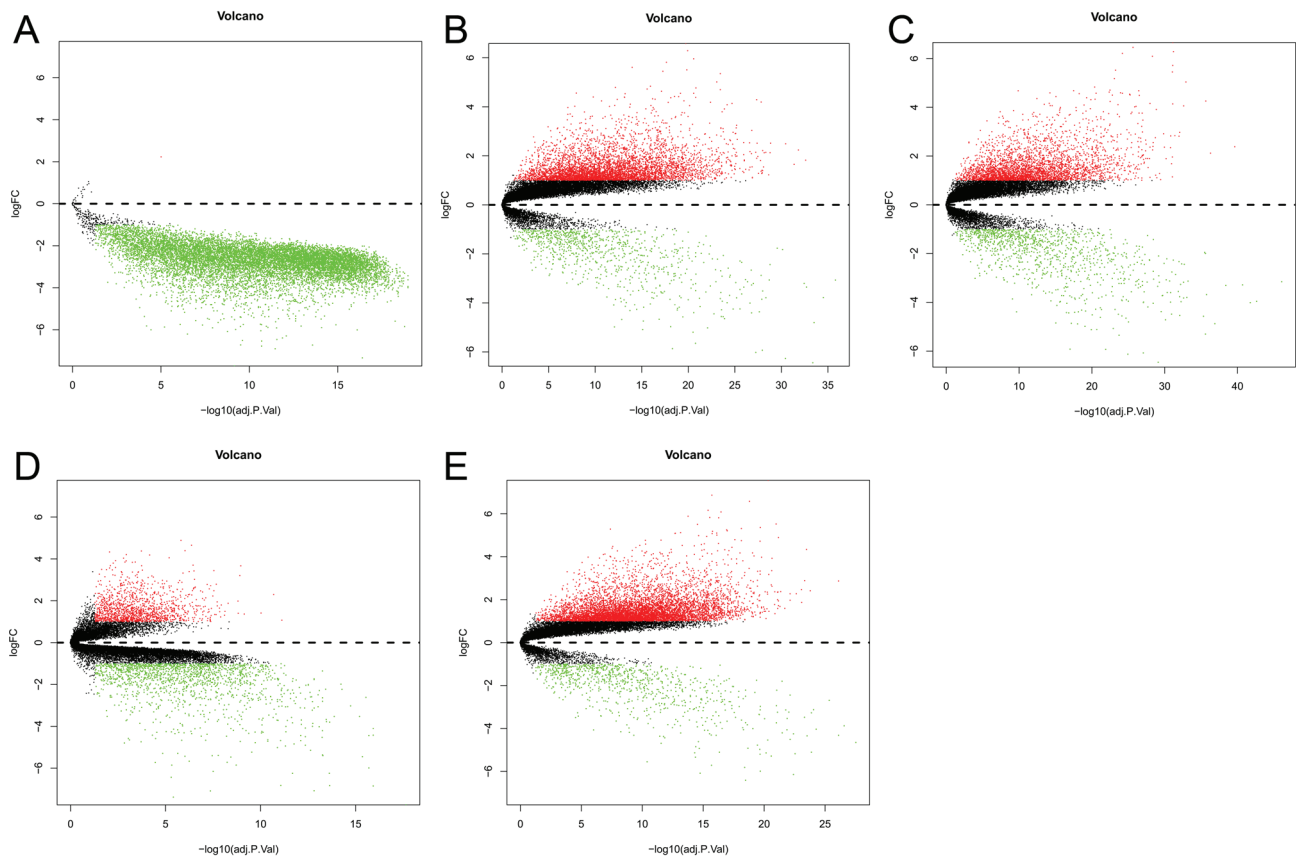

Figure S3. Transcription factor-gene regulatory network constructed using the Cytoscape iRegulion plug-in.

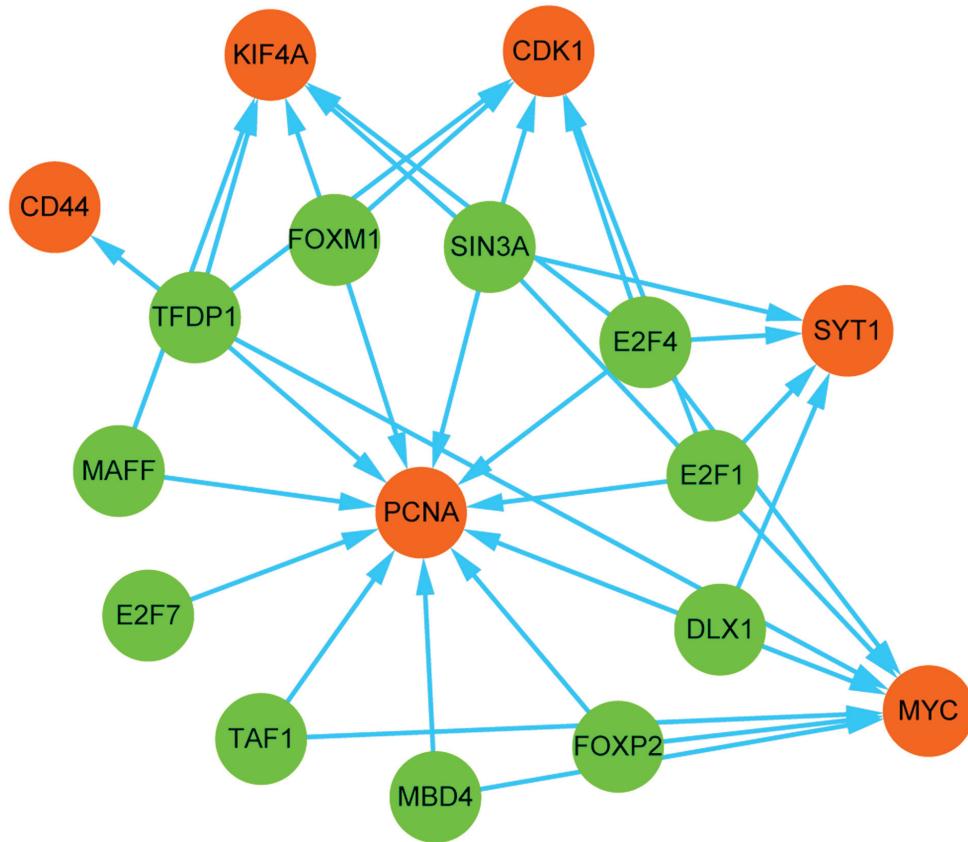

Table SI. Primer sequences for reverse transcription-quantitative polymerase chain reaction.

| Genes          | Sequences                                                                              |
|----------------|----------------------------------------------------------------------------------------|
| hsa-miR-124    | F: 5'-ACACTCCAGCTGGGCAGCAGCAATTCATGTTT-3'<br>R: 5'-CTCAACTGGTGTCTGTGGA-3'              |
| hsa-miR-330-3p | F: 5'-CATGAATTCACTCTCCCCGTTTCTCCCTCTGC-3'<br>R: 5'-CCTGCGGCCGCGAGCCGCCCTGTTTGTCTGAG-3' |
| hsa-miR-34a-5p | F: 5'-TGGCAGTGTCTTAGCTGGTTGT-3'<br>R: 5'-GCGAGCACAGAATTAATACGAC-3'                     |
| hsa-miR-449a   | F: 5'-TGCGGTGGCAGTGTATTGTTAGC-3'<br>R: 5'-CCAGTGCAGGGTCCGAGGT-3'                       |
| CD44           | F: 5'-CGGACACCATGGACAAGTTT-3'<br>R: 5'-TGTC AATCCAGTTTCAGCATCA-3'                      |
| PCNA           | F: 5'-GAACTGGTTCATTCATCTCTATGG-3'<br>F: 5'-TGTCACAGACAAGTAATGTCGATAAAA-3'              |
| SYT1           | F: 5'-CAATAGCCATAGTCGCAGTCCT-3'<br>R: 5'-TGTC AATCCAGTTTCAGCATCA-3'                    |
| U6             | F: 5'-GCTTCGGCAGCACATATACTAAAAT-3'<br>R: 5'-CGCTTCACGAATTTGCGTGTTCAT-3'                |
| GAPDH          | F: 5'-GGAAAGCTGTGGCGTGAT-3'<br>R: 5'-AAGGTGGAAGAATGGGAGTT-3'                           |

hsa, *homo sapiens*; miR, microRNA; CD44, CD44 molecule (Indian blood group); PCNA, proliferating cell nuclear antigen; SYT1, synaptotagmin 1.

Table SII. Downregulated and upregulated differentially expressed miRNAs in the GSE42657 dataset.

| miRNA_ID                 | adj.P.val              | P-value                | t         | B         | logFC     | Expression |
|--------------------------|------------------------|------------------------|-----------|-----------|-----------|------------|
| hsa-miR-124a:9.1         | 3.06x10 <sup>-8</sup>  | 6.97x10 <sup>-11</sup> | -12.20530 | 15.136710 | -4.398000 | Down       |
| hsa-miR-128b:9.1         | 4.83x10 <sup>-8</sup>  | 2.11x10 <sup>-10</sup> | -11.47940 | 14.049030 | -4.368078 | Down       |
| hsa-miR-129-3p           | 4.61x10 <sup>-5</sup>  | 8.46x10 <sup>-7</sup>  | -6.93222  | 5.773031  | -4.324756 | Down       |
| hsa-miR-128a:9.1         | 3.06x10 <sup>-8</sup>  | 8.03x10 <sup>-11</sup> | -12.11100 | 14.998540 | -4.094944 | Down       |
| hsa-miR-124              | 7.24x10 <sup>-5</sup>  | 1.71x10 <sup>-6</sup>  | -6.60268  | 5.065821  | -4.067027 | Down       |
| hsa-miR-1224-5p          | 6.00x10 <sup>-14</sup> | 5.24x10 <sup>-17</sup> | -25.38230 | 28.136500 | -3.884722 | Down       |
| hsa-miR-129 <sup>a</sup> | 3.17x10 <sup>-4</sup>  | 1.38x10 <sup>-5</sup>  | -5.66109  | 2.971619  | -3.588282 | Down       |
| hsa-miR-433              | 5.69x10 <sup>-5</sup>  | 1.16x10 <sup>-6</sup>  | -6.78273  | 5.453998  | -3.508976 | Down       |
| hsa-miR-219-2-3p         | 3.87x10 <sup>-8</sup>  | 1.35x10 <sup>-10</sup> | -11.76620 | 14.485540 | -3.481658 | Down       |
| hsa-miR-326              | 7.24x10 <sup>-5</sup>  | 1.81x10 <sup>-6</sup>  | -6.57766  | 5.011556  | -3.384371 | Down       |
| hsa-miR-876-3p           | 1.27x10 <sup>-4</sup>  | 3.89x10 <sup>-6</sup>  | -6.22635  | 4.241239  | -3.267747 | Down       |
| hsa-miR-329              | 2.98x10 <sup>-5</sup>  | 4.95x10 <sup>-7</sup>  | -7.18774  | 6.311459  | -3.241901 | Down       |
| hsa-miR-873              | 6.62x10 <sup>-6</sup>  | 5.78x10 <sup>-8</sup>  | -8.25560  | 8.464584  | -3.211621 | Down       |
| hsa-miR-138              | 7.24x10 <sup>-5</sup>  | 1.83x10 <sup>-6</sup>  | -6.57067  | 4.996379  | -3.208415 | Down       |
| hsa-miR-137              | 8.10x10 <sup>-4</sup>  | 4.26x10 <sup>-5</sup>  | -5.17132  | 1.846386  | -3.065793 | Down       |
| hsa-miR-383              | 5.83x10 <sup>-6</sup>  | 4.58x10 <sup>-8</sup>  | -8.37650  | 8.698425  | -3.058894 | Down       |
| hsa-miR-1296             | 2.25x10 <sup>-4</sup>  | 7.85x10 <sup>-6</sup>  | -5.91151  | 3.538382  | -2.928583 | Down       |
| hsa-miR-656              | 1.84x10 <sup>-5</sup>  | 2.25x10 <sup>-7</sup>  | -7.57040  | 7.101129  | -2.858111 | Down       |
| hsa-miR-187              | 2.65x10 <sup>-4</sup>  | 1.11x10 <sup>-5</sup>  | -5.75805  | 3.191826  | -2.850080 | Down       |
| hsa-miR-668              | 2.37x10 <sup>-4</sup>  | 9.11x10 <sup>-6</sup>  | -5.84528  | 3.389111  | -2.688792 | Down       |
| hsa-miR-410              | 6.80x10 <sup>-3</sup>  | 6.53x10 <sup>-4</sup>  | -4.01181  | -0.861090 | -2.570598 | Down       |
| hsa-miR-299-5p           | 9.73x10 <sup>-6</sup>  | 1.02x10 <sup>-7</sup>  | -7.96585  | 7.895943  | -2.499440 | Down       |
| hsa-miR-330-3p           | 8.24x10 <sup>-6</sup>  | 7.92x10 <sup>-8</sup>  | -8.09464  | 8.150126  | -2.490239 | Down       |
| hsa-miR-770-5p           | 3.09x10 <sup>-5</sup>  | 5.40x10 <sup>-7</sup>  | -7.14569  | 6.223453  | -2.470578 | Down       |
| hsa-miR-874              | 7.54x10 <sup>-4</sup>  | 3.88x10 <sup>-5</sup>  | -5.21126  | 1.938849  | -2.465748 | Down       |
| hsa-miR-485-3p           | 2.69x10 <sup>-5</sup>  | 3.54x10 <sup>-7</sup>  | -7.34978  | 6.648292  | -2.418290 | Down       |
| hsa-miR-487b             | 7.24x10 <sup>-5</sup>  | 1.77x10 <sup>-6</sup>  | -6.58839  | 5.034846  | -2.341674 | Down       |
| hsa-miR-379              | 1.34x10 <sup>-2</sup>  | 1.48x10 <sup>-3</sup>  | -3.66470  | -1.664200 | -2.283603 | Down       |
| hsa-miR-323-3p           | 2.37x10 <sup>-4</sup>  | 9.12x10 <sup>-6</sup>  | -5.84505  | 3.388584  | -2.275284 | Down       |
| hsa-miR-409-3p           | 6.39x10 <sup>-4</sup>  | 3.13x10 <sup>-5</sup>  | -5.30497  | 2.155375  | -2.272903 | Down       |
| hsa-miR-642              | 3.24x10 <sup>-2</sup>  | 5.09x10 <sup>-3</sup>  | -3.13516  | -2.857160 | -2.250881 | Down       |
| hsa-miR-1249             | 1.33x10 <sup>-2</sup>  | 1.46x10 <sup>-3</sup>  | -3.67057  | -1.650740 | -2.215154 | Down       |
| hsa-miR-598              | 4.95x10 <sup>-4</sup>  | 2.29x10 <sup>-5</sup>  | -5.43959  | 2.465225  | -2.205659 | Down       |
| hsa-miR-490-5p           | 3.94x10 <sup>-3</sup>  | 3.34x10 <sup>-4</sup>  | -4.29486  | -0.200100 | -2.188138 | Down       |
| hsa-miR-885-5p           | 3.13x10 <sup>-3</sup>  | 2.40x10 <sup>-4</sup>  | -4.43420  | 0.126142  | -2.147553 | Down       |
| hsa-miR-7                | 2.54x10 <sup>-4</sup>  | 1.04x10 <sup>-5</sup>  | -5.78609  | 3.255333  | -2.061466 | Down       |
| hsa-miR-409-5p           | 3.94x10 <sup>-3</sup>  | 3.32x10 <sup>-4</sup>  | -4.29729  | -0.194420 | -2.008801 | Down       |
| hsa-miR-889              | 2.37x10 <sup>-4</sup>  | 9.09x10 <sup>-6</sup>  | -5.84644  | 3.391726  | -1.993087 | Down       |
| hsa-miR-154 <sup>a</sup> | 2.04x10 <sup>-2</sup>  | 2.68x10 <sup>-3</sup>  | -3.41152  | -2.240880 | -1.966815 | Down       |
| hsa-miR-128              | 3.12x10 <sup>-3</sup>  | 2.37x10 <sup>-4</sup>  | -4.43938  | 0.138281  | -1.957274 | Down       |
| hsa-miR-330-5p           | 1.64x10 <sup>-4</sup>  | 5.31x10 <sup>-6</sup>  | -6.08604  | 3.929393  | -1.933395 | Down       |
| hsa-miR-7-2 <sup>a</sup> | 1.16x10 <sup>-2</sup>  | 1.22x10 <sup>-3</sup>  | -3.74697  | -1.474950 | -1.831817 | Down       |
| hsa-miR-369-3p           | 4.12x10 <sup>-2</sup>  | 7.24x10 <sup>-3</sup>  | -2.98063  | -3.194010 | -1.827947 | Down       |
| hsa-miR-33b              | 4.53x10 <sup>-2</sup>  | 8.45x10 <sup>-3</sup>  | -2.91225  | -3.340960 | -1.822507 | Down       |
| hsa-miR-539              | 1.66x10 <sup>-3</sup>  | 1.04x10 <sup>-4</sup>  | -4.78750  | 0.953022  | -1.821063 | Down       |
| hsa-miR-379 <sup>a</sup> | 9.36x10 <sup>-3</sup>  | 9.56x10 <sup>-4</sup>  | -3.85061  | -1.235450 | -1.813168 | Down       |
| hsa-miR-1179             | 3.64x10 <sup>-2</sup>  | 6.12x10 <sup>-3</sup>  | -3.05427  | -3.034270 | -1.778167 | Down       |
| hsa-miR-206              | 2.28x10 <sup>-2</sup>  | 3.17x10 <sup>-3</sup>  | -3.34004  | -2.401770 | -1.772400 | Down       |
| hsa-miR-577              | 9.17x10 <sup>-4</sup>  | 5.04x10 <sup>-5</sup>  | -5.09875  | 1.678088  | -1.749504 | Down       |
| hsa-miR-124 <sup>a</sup> | 1.74x10 <sup>-5</sup>  | 1.97x10 <sup>-7</sup>  | -7.63621  | 7.234902  | -1.704053 | Down       |
| hsa-miR-495              | 6.51x10 <sup>-3</sup>  | 6.14x10 <sup>-4</sup>  | -4.03773  | -0.800720 | -1.668726 | Down       |
| hsa-miR-488 <sup>a</sup> | 3.64x10 <sup>-2</sup>  | 6.11x10 <sup>-3</sup>  | -3.05485  | -3.033010 | -1.655069 | Down       |
| hsa-miR-154              | 2.90x10 <sup>-2</sup>  | 4.49x10 <sup>-3</sup>  | -3.18975  | -2.736750 | -1.641024 | Down       |
| hsa-miR-127-3p           | 1.75x10 <sup>-3</sup>  | 1.14x10 <sup>-4</sup>  | -4.74849  | 0.861836  | -1.615866 | Down       |
| hsa-miR-655              | 2.65x10 <sup>-2</sup>  | 3.81x10 <sup>-3</sup>  | -3.26030  | -2.580090 | -1.592616 | Down       |
| hsa-miR-628-5p           | 1.61x10 <sup>-2</sup>  | 1.90x10 <sup>-3</sup>  | -3.55964  | -1.904660 | -1.541800 | Down       |
| hsa-miR-744              | 1.89x10 <sup>-3</sup>  | 1.29x10 <sup>-4</sup>  | -4.69880  | 0.745644  | -1.537217 | Down       |
| hsa-miR-584              | 1.61x10 <sup>-2</sup>  | 1.91x10 <sup>-3</sup>  | -3.55697  | -1.910760 | -1.537108 | Down       |
| hsa-miR-133b             | 1.00x10 <sup>-3</sup>  | 5.59x10 <sup>-5</sup>  | -5.05426  | 1.574767  | -1.523298 | Down       |

Table SII. Continued.

| miRNA_ID                       | adj.P.val             | P-value               | t        | B         | logFC     | Expression |
|--------------------------------|-----------------------|-----------------------|----------|-----------|-----------|------------|
| hsa-miR-769-3p                 | 3.89x10 <sup>-2</sup> | 6.73x10 <sup>-3</sup> | -3.01244 | -3.125180 | -1.515118 | Down       |
| hsa-miR-107                    | 5.90x10 <sup>-3</sup> | 5.45x10 <sup>-4</sup> | -4.08852 | -0.682330 | -1.503248 | Down       |
| hsa-miR-338-3p                 | 3.72x10 <sup>-4</sup> | 1.69x10 <sup>-5</sup> | -5.57293 | 2.770594  | -1.486301 | Down       |
| hsa-miR-29c <sup>a</sup>       | 7.33x10 <sup>-3</sup> | 7.16x10 <sup>-4</sup> | -3.97289 | -0.951670 | -1.443588 | Down       |
| hsa-miR-340 <sup>a</sup>       | 5.66x10 <sup>-3</sup> | 5.14x10 <sup>-4</sup> | -4.11297 | -0.625260 | -1.404232 | Down       |
| hsa-miR-138-1 <sup>a</sup>     | 7.82x10 <sup>-3</sup> | 7.85x10 <sup>-4</sup> | -3.93402 | -1.042010 | -1.329171 | Down       |
| hsa-miR-548k                   | 4.68x10 <sup>-7</sup> | 2.46x10 <sup>-9</sup> | -9.98282 | 11.618980 | -1.302216 | Down       |
| hsa-miR-139-3p                 | 2.78x10 <sup>-2</sup> | 4.07x10 <sup>-3</sup> | -3.23184 | -2.643430 | -1.290689 | Down       |
| hsa-miR-548o                   | 3.64x10 <sup>-2</sup> | 6.08x10 <sup>-3</sup> | -3.05745 | -3.027340 | -1.271591 | Down       |
| hsa-miR-342-3p                 | 1.89x10 <sup>-4</sup> | 6.29x10 <sup>-6</sup> | -6.01066 | 3.760928  | -1.248232 | Down       |
| hsa-miR-138-2 <sup>a</sup>     | 2.62x10 <sup>-3</sup> | 1.88x10 <sup>-4</sup> | -4.53820 | 0.369723  | -1.240113 | Down       |
| hsa-miR-181b                   | 1.28x10 <sup>-4</sup> | 4.01x10 <sup>-6</sup> | -6.21261 | 4.210803  | -1.231861 | Down       |
| hsa-miR-136 <sup>a</sup>       | 3.57x10 <sup>-2</sup> | 5.77x10 <sup>-3</sup> | -3.08050 | -2.977030 | -1.210438 | Down       |
| hsa-miR-487a                   | 2.87x10 <sup>-2</sup> | 4.34x10 <sup>-3</sup> | -3.20459 | -2.703870 | -1.186042 | Down       |
| hsa-miR-132 <sup>a</sup>       | 4.81x10 <sup>-2</sup> | 9.20x10 <sup>-3</sup> | -2.87457 | -3.421340 | -1.093071 | Down       |
| hsa-miR-197                    | 4.12x10 <sup>-2</sup> | 7.20x10 <sup>-3</sup> | -2.98305 | -3.188770 | -1.089135 | Down       |
| hsa-miR-491-5p                 | 2.04x10 <sup>-2</sup> | 2.73x10 <sup>-3</sup> | -3.40487 | -2.255880 | -1.083874 | Down       |
| hsa-miR-328                    | 2.87x10 <sup>-2</sup> | 4.31x10 <sup>-3</sup> | -3.20714 | -2.698240 | -1.065684 | Down       |
| hsa-miR-342-5p                 | 4.71x10 <sup>-2</sup> | 8.97x10 <sup>-3</sup> | -2.88550 | -3.398070 | -1.039282 | Down       |
| hsa-miR-885-3p                 | 2.70x10 <sup>-2</sup> | 3.92x10 <sup>-3</sup> | -3.24879 | -2.605730 | -1.025146 | Down       |
| hsa-miR-671-3p                 | 4.95x10 <sup>-2</sup> | 9.52x10 <sup>-3</sup> | -2.85925 | -3.453910 | -1.005048 | Down       |
| hsa-miR-450a                   | 2.90x10 <sup>-2</sup> | 4.53x10 <sup>-3</sup> | 3.18579  | -2.745500 | 1.020921  | Up         |
| hsa-miR-193a-3p                | 4.15x10 <sup>-2</sup> | 7.32x10 <sup>-3</sup> | 2.97566  | -3.204720 | 1.087457  | Up         |
| hsa-miR-148a                   | 8.15x10 <sup>-5</sup> | 2.28x10 <sup>-6</sup> | 6.47120  | 4.779735  | 1.097744  | Up         |
| hsa-miR-199a-5p                | 4.11x10 <sup>-3</sup> | 3.51x10 <sup>-4</sup> | 4.27347  | -0.250150 | 1.112635  | Up         |
| hsa-miR-106a                   | 1.49x10 <sup>-3</sup> | 9.00x10 <sup>-5</sup> | 4.85101  | 1.101323  | 1.125590  | Up         |
| hsa-miR-363                    | 6.50x10 <sup>-3</sup> | 6.07x10 <sup>-4</sup> | 4.04250  | -0.789600 | 1.125833  | Up         |
| hsa-miR-545:9.1                | 2.92x10 <sup>-3</sup> | 2.19x10 <sup>-4</sup> | 4.47324  | 0.217586  | 1.156359  | Up         |
| hsa-miR-92b                    | 1.17x10 <sup>-2</sup> | 1.24x10 <sup>-3</sup> | 3.74008  | -1.490830 | 1.191967  | Up         |
| hsa-miR-17 <sup>a</sup>        | 1.61x10 <sup>-2</sup> | 1.94x10 <sup>-3</sup> | 3.55130  | -1.923700 | 1.223239  | Up         |
| hsa-miR-18a                    | 5.90x10 <sup>-3</sup> | 5.46x10 <sup>-4</sup> | 4.08761  | -0.684430 | 1.241874  | Up         |
| hsa-miR-503                    | 4.21x10 <sup>-2</sup> | 7.47x10 <sup>-3</sup> | 2.96689  | -3.223650 | 1.248250  | Up         |
| hsa-miR-339-5p                 | 1.71x10 <sup>-3</sup> | 1.09x10 <sup>-4</sup> | 4.76987  | 0.911809  | 1.271402  | Up         |
| hsa-miR-18b                    | 1.72x10 <sup>-2</sup> | 2.15x10 <sup>-3</sup> | 3.50642  | -2.025890 | 1.273376  | Up         |
| hsa-miR-16-1 <sup>a</sup>      | 2.04x10 <sup>-2</sup> | 2.70x10 <sup>-3</sup> | 3.40837  | -2.248000 | 1.326431  | Up         |
| hsa-miR-592                    | 2.78x10 <sup>-3</sup> | 2.07x10 <sup>-4</sup> | 4.49782  | 0.275145  | 1.374665  | Up         |
| hsa-miR-24-2 <sup>a</sup>      | 9.29x10 <sup>-7</sup> | 5.68x10 <sup>-9</sup> | 9.50396  | 10.783770 | 1.399102  | Up         |
| hsa-miR-34a                    | 1.25x10 <sup>-6</sup> | 8.76x10 <sup>-9</sup> | 9.26296  | 10.352250 | 1.450013  | Up         |
| hsa-miR-1246                   | 2.11x10 <sup>-2</sup> | 2.85x10 <sup>-3</sup> | 3.38632  | -2.297720 | 1.457936  | Up         |
| hsa-miR-603                    | 1.81x10 <sup>-2</sup> | 2.31x10 <sup>-3</sup> | 3.47634  | -2.094180 | 1.478898  | Up         |
| hsa-miR-141                    | 2.44x10 <sup>-3</sup> | 1.73x10 <sup>-4</sup> | 4.57434  | 0.454354  | 1.550393  | Up         |
| hsa-miR-142-3p                 | 6.54x10 <sup>-5</sup> | 1.43x10 <sup>-6</sup> | 6.68694  | 5.248004  | 1.551637  | Up         |
| hsa-miR-19a                    | 5.69x10 <sup>-5</sup> | 1.19x10 <sup>-6</sup> | 6.77089  | 5.428586  | 1.586584  | Up         |
| hsa-miR-199a <sup>a</sup> :9.1 | 1.31x10 <sup>-3</sup> | 7.69x10 <sup>-5</sup> | 4.91776  | 1.257033  | 1.586803  | Up         |
| hsa-miR-135a                   | 5.66x10 <sup>-3</sup> | 5.13x10 <sup>-4</sup> | 4.11388  | -0.623150 | 1.592555  | Up         |
| hsa-miR-146b-5p                | 5.09x10 <sup>-3</sup> | 4.44x10 <sup>-4</sup> | 4.17458  | -0.481390 | 1.598980  | Up         |
| hsa-miR-155                    | 2.75x10 <sup>-4</sup> | 1.17x10 <sup>-5</sup> | 5.73272  | 3.134383  | 1.627800  | Up         |
| hsa-miR-1251                   | 4.48x10 <sup>-2</sup> | 8.08x10 <sup>-3</sup> | 2.93226  | -3.298100 | 1.629974  | Up         |
| hsa-miR-32                     | 3.58x10 <sup>-2</sup> | 5.84x10 <sup>-3</sup> | 3.07499  | -2.989060 | 1.655588  | Up         |
| hsa-miR-100 <sup>a</sup>       | 3.86x10 <sup>-3</sup> | 3.17x10 <sup>-4</sup> | 4.31705  | -0.148160 | 1.683209  | Up         |
| hsa-miR-449a                   | 3.81x10 <sup>-2</sup> | 6.46x10 <sup>-3</sup> | 3.03101  | -3.084880 | 1.685879  | Up         |
| hsa-miR-92b <sup>a</sup>       | 3.28x10 <sup>-2</sup> | 5.22x10 <sup>-3</sup> | 3.12400  | -2.881710 | 1.689690  | Up         |
| hsa-miR-10a <sup>a</sup>       | 8.05x10 <sup>-3</sup> | 8.16x10 <sup>-4</sup> | 3.91778  | -1.079720 | 1.711922  | Up         |
| hsa-miR-16-2 <sup>a</sup>      | 1.90x10 <sup>-3</sup> | 1.31x10 <sup>-4</sup> | 4.69125  | 0.727978  | 1.779191  | Up         |
| hsa-miR-210                    | 2.90x10 <sup>-2</sup> | 4.53x10 <sup>-3</sup> | 3.18614  | -2.744720 | 1.787449  | Up         |
| hsa-miR-34a <sup>a</sup>       | 5.99x10 <sup>-4</sup> | 2.83x10 <sup>-5</sup> | 5.34867  | 2.256127  | 1.860500  | Up         |
| hsa-miR-214                    | 3.94x10 <sup>-3</sup> | 3.31x10 <sup>-4</sup> | 4.29813  | -0.192450 | 1.903700  | Up         |
| hsa-miR-610                    | 2.11x10 <sup>-2</sup> | 2.85x10 <sup>-3</sup> | 3.38569  | -2.299130 | 1.952833  | Up         |
| hsa-miR-301a                   | 7.80x10 <sup>-5</sup> | 2.11x10 <sup>-6</sup> | 6.50600  | 4.855662  | 1.981815  | Up         |

Table SII. Continued.

| miRNA_ID                 | adj.P.val             | P-value               | t       | B         | logFC    | Expression |
|--------------------------|-----------------------|-----------------------|---------|-----------|----------|------------|
| hsa-miR-551b             | 1.75x10 <sup>-3</sup> | 1.14x10 <sup>-4</sup> | 4.75033 | 0.866148  | 2.091346 | Up         |
| hsa-miR-31 <sup>a</sup>  | 2.87x10 <sup>-2</sup> | 4.26x10 <sup>-3</sup> | 3.21278 | -2.685730 | 2.179291 | Up         |
| hsa-miR-10b              | 1.62x10 <sup>-2</sup> | 1.99x10 <sup>-3</sup> | 3.53932 | -1.951000 | 2.280868 | Up         |
| hsa-miR-1247             | 1.53x10 <sup>-2</sup> | 1.75x10 <sup>-3</sup> | 3.59483 | -1.824300 | 2.377220 | Up         |
| hsa-miR-142-5p           | 5.40x10 <sup>-3</sup> | 4.77x10 <sup>-4</sup> | 4.14479 | -0.550980 | 2.395549 | Up         |
| hsa-miR-20a <sup>a</sup> | 8.15x10 <sup>-5</sup> | 2.35x10 <sup>-6</sup> | 6.45679 | 4.748252  | 2.489395 | Up         |
| hsa-miR-34c-5p           | 1.85x10 <sup>-3</sup> | 1.23x10 <sup>-4</sup> | 4.71854 | 0.791820  | 2.949769 | Up         |
| hsa-miR-144:9.1          | 9.78x10 <sup>-3</sup> | 1.02x10 <sup>-3</sup> | 3.82467 | -1.295490 | 3.046745 | Up         |
| hsa-miR-34b <sup>a</sup> | 1.89x10 <sup>-3</sup> | 1.28x10 <sup>-4</sup> | 4.70256 | 0.754432  | 3.072460 | Up         |
| hsa-miR-483-3p           | 1.25x10 <sup>-3</sup> | 7.19x10 <sup>-5</sup> | 4.94696 | 1.325087  | 3.192252 | Up         |
| hsa-miR-923              | 2.98x10 <sup>-5</sup> | 4.75x10 <sup>-7</sup> | 7.20772 | 6.353177  | 3.231787 | Up         |

hsa, *homo sapiens*; miR, microRNA; adj.P.val; adjusted P-value; FC, fold change; <sup>a</sup>lowly expressed miRNA.

Table SIII. Top 5 significant Gene Ontology terms of up- and downregulated differentially expressed genes.

| A, Upregulated   |                                                            |       |          |                        |
|------------------|------------------------------------------------------------|-------|----------|------------------------|
| Category         | Term                                                       | Count | %        | P-value                |
| CC               | GO:0070062~extracellular exosome                           | 171   | 28.73950 | 1.22x10 <sup>-19</sup> |
| CC               | GO:0031012~extracellular matrix                            | 44    | 7.39496  | 1.78x10 <sup>-17</sup> |
| CC               | GO:0005578~proteinaceous extracellular matrix              | 33    | 5.54622  | 6.18x10 <sup>-11</sup> |
| CC               | GO:0005604~basement membrane                               | 16    | 2.68908  | 1.61x10 <sup>-8</sup>  |
| CC               | GO:0005783~endoplasmic reticulum                           | 56    | 9.41177  | 7.49x10 <sup>-8</sup>  |
| BP               | GO:0030198~extracellular matrix organization               | 38    | 6.38656  | 1.47x10 <sup>-18</sup> |
| BP               | GO:0007155~cell adhesion                                   | 38    | 6.38656  | 2.70x10 <sup>-7</sup>  |
| BP               | GO:0042493~response to drug                                | 28    | 4.70588  | 1.85x10 <sup>-6</sup>  |
| BP               | GO:0051301~cell division                                   | 29    | 4.87395  | 8.95x10 <sup>-6</sup>  |
| BP               | GO:0007067~mitotic nuclear division                        | 23    | 3.86555  | 1.70x10 <sup>-5</sup>  |
| MF               | GO:0005201~extracellular matrix structural constituent     | 18    | 3.02521  | 2.36x10 <sup>-11</sup> |
| MF               | GO:0005515~protein binding                                 | 356   | 59.83193 | 5.87x10 <sup>-11</sup> |
| MF               | GO:0005178~integrin binding                                | 18    | 3.02521  | 3.72x10 <sup>-8</sup>  |
| MF               | GO:0005509~calcium ion binding                             | 47    | 7.89916  | 6.05x10 <sup>-6</sup>  |
| MF               | GO:0004859~phospholipase inhibitor activity                | 6     | 1.00840  | 1.31x10 <sup>-5</sup>  |
| B, Downregulated |                                                            |       |          |                        |
| Category         | Term                                                       | Count | %        | P-value                |
| CC               | GO:0030054~cell junction                                   | 59    | 17.77108 | 3.14x10 <sup>-33</sup> |
| CC               | GO:0005886~plasma membrane                                 | 139   | 41.86747 | 5.47x10 <sup>-17</sup> |
| CC               | GO:0045211~postsynaptic membrane                           | 29    | 8.73494  | 5.56x10 <sup>-17</sup> |
| CC               | GO:0045202~synapse                                         | 26    | 7.83133  | 1.17x10 <sup>-15</sup> |
| CC               | GO:0014069~postsynaptic density                            | 25    | 7.53012  | 1.65x10 <sup>-14</sup> |
| BP               | GO:0007268~chemical synaptic transmission                  | 45    | 13.55422 | 1.22x10 <sup>-31</sup> |
| BP               | GO:0007269~neurotransmitter secretion                      | 17    | 5.12048  | 3.51x10 <sup>-16</sup> |
| BP               | GO:0014047~glutamate secretion                             | 14    | 4.21687  | 5.00x10 <sup>-16</sup> |
| BP               | GO:0007399~nervous system development                      | 28    | 8.43374  | 2.56x10 <sup>-12</sup> |
| BP               | GO:0016079~synaptic vesicle exocytosis                     | 10    | 3.01205  | 7.51x10 <sup>-11</sup> |
| MF               | GO:0005509~calcium ion binding                             | 37    | 11.14458 | 1.92x10 <sup>-8</sup>  |
| MF               | GO:0004890~GABA-A receptor activity                        | 8     | 2.40964  | 2.19x10 <sup>-8</sup>  |
| MF               | GO:0044325~ion channel binding                             | 13    | 3.91566  | 7.95x10 <sup>-7</sup>  |
| MF               | GO:0005230~extracellular ligand-gated ion channel activity | 8     | 2.40964  | 1.50x10 <sup>-6</sup>  |
| MF               | GO:0005246~calcium channel regulator activity              | 7     | 2.10843  | 6.48x10 <sup>-6</sup>  |

GO, gene ontology; CC, cellular component; BP, biological process; MF, molecular function.



Table SIV. Top 10 significant Kyoto Encyclopedia of Genes and Genomes terms of the up- and downregulated differentially expressed genes.

| A, Upregulated                                |       |                        |                                                                                                                                                                                                           |
|-----------------------------------------------|-------|------------------------|-----------------------------------------------------------------------------------------------------------------------------------------------------------------------------------------------------------|
| Term                                          | Count | P-value                | Genes                                                                                                                                                                                                     |
| hsa04512:ECM-receptor interaction             | 19    | 9.70x10 <sup>-9</sup>  | <i>COL4A2, COL4A1, TNC, COL3A1, ITGB4, COL5A2, COL5A1, COL4A5, LAMA2, LAMA1, LAMB2, ITGA6, CD44, ITGA7, COL6A2, COL1A2, COL1A1, LAMC1, FN1</i>                                                            |
| hsa04510:Focal adhesion                       | 23    | 3.41x10 <sup>-5</sup>  | <i>COL4A2, CAV1, COL4A1, TNC, COL3A1, ITGB4, FLNC, COL5A2, FLNA, COL5A1, KDR, COL4A5, LAMA2, LAMA1, VEGFC, LAMB2, ITGA6, ITGA7, COL1A2, COL6A2, COL1A1, LAMC1, FN1</i>                                    |
| hsa05332:Graft-versus-host disease            | 9     | 4.17x10 <sup>-5</sup>  | <i>HLA-DRB1, HLA-A, HLA-C, HLA-DPA1, HLA-B, FAS, HLA-DMA, HLA-G, HLA-DRA</i>                                                                                                                              |
| hsa05330:Allograft rejection                  | 9     | 1.01x10 <sup>-4</sup>  | <i>HLA-DRB1, HLA-A, HLA-C, HLA-DPA1, HLA-B, FAS, HLA-DMA, HLA-G, HLA-DRA</i>                                                                                                                              |
| hsa04940:Type I diabetes mellitus             | 9     | 2.57x10 <sup>-4</sup>  | <i>HLA-DRB1, HLA-A, HLA-C, HLA-DPA1, HLA-B, FAS, HLA-DMA, HLA-G, HLA-DRA</i>                                                                                                                              |
| hsa05416:Viral myocarditis                    | 10    | 4.67x10 <sup>-4</sup>  | <i>CAV1, HLA-DRB1, HLA-A, HLA-C, HLA-DPA1, HLA-B, ABL1, HLA-DMA, HLA-G, HLA-DRA</i>                                                                                                                       |
| hsa05222:Small cell lung cancer               | 12    | 6.60x10 <sup>-4</sup>  | <i>LAMA2, CKS1B, LAMA1, COL4A2, COL4A1, LAMB2, ITGA6, LAMC1, CDK4, MYC, COL4A5, FN1</i>                                                                                                                   |
| hsa04151:PI3K-Akt signaling pathway           | 28    | 8.87x10 <sup>-4</sup>  | <i>PPP2R3A, TNC, COL3A1, ITGB4, GNG12, G6PC3, LAMB2, COL6A2, GNG5, MYC, FN1, COL4A2, COL4A1, CDK4, COL5A2, COL5A1, KDR, COL4A5, LAMA2, NRAS, VEGFC, LAMA1, ITGA6, LPAR6, ITGA7, COL1A2, COL1A1, LAMC1</i> |
| hsa05320:Autoimmune thyroid disease           | 9     | 1.148x10 <sup>-3</sup> | <i>HLA-DRB1, HLA-A, HLA-C, HLA-DPA1, HLA-B, FAS, HLA-DMA, HLA-G, HLA-DRA</i>                                                                                                                              |
| hsa05146:Amoebiasis                           | 13    | 1.277x10 <sup>-3</sup> | <i>LAMA2, LAMA1, COL4A2, COL4A1, LAMB2, COL3A1, COL1A2, COL1A1, LAMC1, COL5A2, COL5A1, COL4A5, FN1</i>                                                                                                    |
| B, Downregulated                              |       |                        |                                                                                                                                                                                                           |
| Term                                          | Count | P-value                | Genes                                                                                                                                                                                                     |
| hsa04727:GABAergic synapse                    | 21    | 1.12x10 <sup>-16</sup> | <i>GABRD, GABRG2, GABRA2, GABARAPL1, ADCY1, GABRA1, GNAO1, GABRB3, GABRA4, GABRB2, GABRB1, GNG13, GABBR2, PRKCB, GLS2, PLCL1, KCNJ6, GNB5, GNG3, GAD1, CACNA1B</i>                                        |
| hsa04723:Retrograde endocannabinoid signaling | 22    | 2.74x10 <sup>-16</sup> | <i>GABRD, GABRG2, GABRA2, ADCY1, GABRA1, GNAO1, GABRB3, GABRA4, GABRB2, GABRB1, GNG13, RIMS1, ITPR1, PRKCB, SLC17A7, KCNJ6, PLCB4, KCNJ9, GRIA2, GNB5, GNG3, CACNA1B</i>                                  |
| hsa05032:Morphine addiction                   | 20    | 7.79x10 <sup>-15</sup> | <i>GABRD, GABRG2, GABRA2, ADCY1, GABRA1, GNAO1, GABRB3, GABRA4, GABRB2, GABRB1, GNG13, GABBR2, PRKCB, KCNJ6, KCNJ9, ARRB1, PDE1A, GNB5, GNG3, CACNA1B</i>                                                 |
| hsa04724:Glutamatergic synapse                | 18    | 6.81x10 <sup>-11</sup> | <i>DLGAPI, ADCY1, GNAO1, GNG13, HOMER1, ITPR1, PRKCB, SLC17A7, GLS2, GRM3, SLC1A2, PLCB4, GRIA2, SLC1A6, GNB5, GNG3, PPP3CA, SLC1A1</i>                                                                   |
| hsa04721:Synaptic vesicle cycle               | 13    | 2.78x10 <sup>-9</sup>  | <i>RAB3A, SYT1, STX1A, CPLX2, STXBPI, ATP6V1G2, RIMS1, SLC17A7, VAMP2, SNAP25, DNMI, UNC13A, CACNA1B</i>                                                                                                  |
| hsa05033:Nicotine addiction                   | 11    | 3.70x10 <sup>-9</sup>  | <i>SLC17A7, GABRD, GABRG2, GABRA2, GABRA1, GRIA2, GABRB3, GABRA4, GABRB2, GABRB1, CACNA1B</i>                                                                                                             |
| hsa04713:Circadian entrainment                | 15    | 4.26x10 <sup>-9</sup>  | <i>ADCY1, GNAO1, GNG13, ITPR1, PRKCB, PLCB4, KCNJ6, KCNJ9, GRIA2, GUCY1A2, RYR2, GNB5, CAMK2B, GUCY1B3, GNG3</i>                                                                                          |
| hsa04921:Oxytocin signaling pathway           | 17    | 7.89x10 <sup>-8</sup>  | <i>ADCY1, GNAO1, CACNB2, CACNG2, CACNB4, ITPR1, PRKCB, CAMKK2, KCNJ6, PLCB4, CAMK4, KCNJ9, GUCY1A2, RYR2, CAMK2B, GUCY1B3, PPP3CA</i>                                                                     |
| hsa04911:Insulin secretion                    | 13    | 9.44x10 <sup>-8</sup>  | <i>KCNMB4, RAB3A, STX1A, ADCY1, RIMS2, PCLO, PRKCB, PLCB4, RYR2, CAMK2B, RAPGEF4, VAMP2, SNAP25</i>                                                                                                       |
| hsa04728:Dopaminergic synapse                 | 15    | 2.07x10 <sup>-7</sup>  | <i>SCN1A, GNAO1, KIF5C, GNG13, ITPR1, PRKCB, KCNJ6, PLCB4, KCNJ9, GRIA2, GNB5, CAMK2B, GNG3, PPP3CA, CACNA1B</i>                                                                                          |

hsa, *homo sapiens*.

Table SV. Topology of the protein-protein interaction network of differentially expressed genes.

| Node 1  | Node 2   | Combined_score |
|---------|----------|----------------|
| VAMP2   | SNAP25   | 0.999          |
| CDK1    | BUB1B    | 0.999          |
| SYT1    | STX1A    | 0.999          |
| SNAP25  | STX1A    | 0.999          |
| SYT1    | SNAP25   | 0.999          |
| POLI    | PCNA     | 0.999          |
| SNRPG   | SNRPD3   | 0.999          |
| VEGFC   | KDR      | 0.999          |
| LSM7    | SNRPD3   | 0.999          |
| CDK1    | CCNB1    | 0.999          |
| CDK1    | CKS1B    | 0.999          |
| PRMT5   | WDR77    | 0.999          |
| PSMB8   | PSMB9    | 0.999          |
| WEE1    | CDK1     | 0.998          |
| CDK1    | CCNA1    | 0.998          |
| DDOST   | DAD1     | 0.998          |
| VAMP2   | STX1A    | 0.998          |
| WASF1   | CYFIP2   | 0.998          |
| TTK     | BUB1B    | 0.998          |
| NUP37   | NUP107   | 0.998          |
| STXBP1  | STX1A    | 0.998          |
| COL4A1  | COL4A2   | 0.998          |
| ACTL6A  | RUVBL1   | 0.998          |
| ZWINT   | BUB1B    | 0.997          |
| CACNG2  | GRIA2    | 0.997          |
| CCNB1   | CCNA1    | 0.997          |
| S100A10 | ANXA2    | 0.997          |
| PRKCZ   | PARD3    | 0.997          |
| WEE1    | CCNB1    | 0.997          |
| DDOST   | SEC61A1  | 0.997          |
| PCNA    | KIAA0101 | 0.997          |
| SCN2A   | SCN3A    | 0.996          |
| SNAP25  | VAMP3    | 0.996          |
| VAMP2   | SYT1     | 0.996          |
| CDK1    | RRM2     | 0.996          |
| NID1    | LAMC1    | 0.996          |
| MIS12   | ZWINT    | 0.995          |
| CKS1B   | CCNB1    | 0.995          |
| CDK1    | TPX2     | 0.995          |
| RGS7    | GNB5     | 0.995          |
| SCN8A   | SCN2A    | 0.995          |
| CDK1    | FOXM1    | 0.995          |
| FKBP1B  | RYR2     | 0.995          |
| FOXM1   | CCNB1    | 0.995          |
| CDK1    | PCNA     | 0.995          |
| VAMP8   | SNAP25   | 0.994          |
| BUB1B   | CCNB1    | 0.994          |
| TUBB4A  | TUBA4A   | 0.994          |
| STT3A   | DDOST    | 0.994          |
| UBE2C   | BUB1B    | 0.994          |
| CDK4    | CCNB1    | 0.994          |
| PMF1    | ZWINT    | 0.993          |
| STXBP1  | SNAP25   | 0.993          |
| PCNA    | CDK4     | 0.993          |
| KIF13B  | ADAP1    | 0.993          |
| UBE2C   | PTTG1    | 0.992          |
| DCTD    | TYMS     | 0.992          |
| PCNA    | MCM2     | 0.992          |

Table SV. Continued.

| Node 1  | Node 2   | Combined_score |
|---------|----------|----------------|
| PMF1    | MIS12    | 0.992          |
| BMP7    | ACVR1    | 0.992          |
| UBE2C   | CCNB1    | 0.992          |
| CENPF   | FOXM1    | 0.991          |
| PCNA    | RRM2     | 0.991          |
| COL1A2  | COL1A1   | 0.991          |
| STXBP1  | VAMP2    | 0.991          |
| MYC     | CDK4     | 0.990          |
| COL3A1  | COL1A1   | 0.990          |
| STT3A   | DAD1     | 0.990          |
| CENPF   | CCNB1    | 0.990          |
| KIF20A  | KIF4A    | 0.990          |
| CENPF   | BUB1B    | 0.990          |
| FBLN5   | ELN      | 0.990          |
| CDK1    | SMC4     | 0.990          |
| ELN     | LOX      | 0.989          |
| RHOBTB3 | PLIN3    | 0.989          |
| HLA-DRA | HLA-DMA  | 0.989          |
| IFT88   | IFT57    | 0.989          |
| CDK1    | UBE2C    | 0.989          |
| CDK1    | CENPF    | 0.989          |
| MIS12   | BUB1B    | 0.989          |
| SCN1A   | SCN3A    | 0.988          |
| COL3A1  | COL1A2   | 0.988          |
| SCN8A   | SCN1A    | 0.988          |
| FBN1    | ELN      | 0.987          |
| MFAP2   | ELN      | 0.987          |
| SNAP25  | RAB3A    | 0.987          |
| P4HB    | CALR     | 0.987          |
| FBLN5   | LOXL1    | 0.986          |
| ITGA6   | ITGB4    | 0.986          |
| SYT1    | RAB3A    | 0.986          |
| SCN8A   | SCN3A    | 0.986          |
| COL5A2  | COL3A1   | 0.985          |
| STXBP1  | APBA1    | 0.985          |
| CTNNA1  | CDH2     | 0.985          |
| SCN1B   | SCN1A    | 0.985          |
| DNM1    | AMPH     | 0.985          |
| GNG3    | GNB5     | 0.985          |
| CDK1    | ZWINT    | 0.985          |
| ARG2    | ODC1     | 0.984          |
| LAMB2   | NID1     | 0.984          |
| RRM2    | TYMS     | 0.984          |
| RIMS1   | RAB3A    | 0.984          |
| MYC     | CCNB1    | 0.984          |
| WEE1    | CCNA1    | 0.984          |
| GNG5    | GNB5     | 0.983          |
| TEAD3   | YAP1     | 0.983          |
| MYC     | ODC1     | 0.983          |
| STK3    | YAP1     | 0.983          |
| GANAB   | CALR     | 0.983          |
| HLA-DRA | HLA-G    | 0.982          |
| PCNA    | TYMS     | 0.982          |
| PAK1    | ARHGEF6  | 0.982          |
| SYT1    | VAMP3    | 0.982          |
| KCNAB1  | KCNA1    | 0.981          |
| C1R     | SERPING1 | 0.981          |
| DDOST   | SSR4     | 0.981          |
| ZWINT   | CCNB1    | 0.981          |

Table SV. Continued.

| Node 1 | Node 2   | Combined_score |
|--------|----------|----------------|
| RIMS2  | RAPGEF4  | 0.980          |
| ACTL6A | MYC      | 0.980          |
| TCF7L2 | TCF7L1   | 0.979          |
| LAMA1  | NID1     | 0.979          |
| SCN2A  | ANK3     | 0.979          |
| SYN1   | RAB3A    | 0.979          |
| COL5A2 | COL1A2   | 0.979          |
| VAMP2  | RAB3A    | 0.978          |
| SH3GL2 | AMPH     | 0.978          |
| BGN    | VCAN     | 0.978          |
| TRIM22 | GBP1     | 0.978          |
| FBLN5  | LOX      | 0.978          |
| TNC    | VCAN     | 0.977          |
| MAPRE1 | TUBB4A   | 0.977          |
| CDK1   | PTTG1    | 0.977          |
| PCNA   | RBBP8    | 0.977          |
| NRXN1  | LRRTM2   | 0.976          |
| DLG2   | DLGAP1   | 0.976          |
| SNRPG  | LSM7     | 0.976          |
| LOXL1  | ELN      | 0.976          |
| ARRB1  | ADRB2    | 0.976          |
| ZWINT  | CENPF    | 0.975          |
| E2F5   | CCNA1    | 0.975          |
| MAPRE1 | TUBA4A   | 0.975          |
| HOMER1 | DLGAP1   | 0.974          |
| SCN1A  | SCN2B    | 0.974          |
| SNAP91 | AMPH     | 0.974          |
| GNAO1  | GNG13    | 0.974          |
| FLNA   | ITGB4    | 0.973          |
| SCN1B  | SCN2A    | 0.973          |
| ISG15  | PCNA     | 0.973          |
| COL5A1 | COL1A1   | 0.972          |
| RBBP8  | BARD1    | 0.972          |
| MFAP2  | FBN1     | 0.972          |
| FAS    | EZR      | 0.971          |
| GNG3   | GNG13    | 0.971          |
| FOS    | CCL2     | 0.971          |
| CDK1   | FOS      | 0.971          |
| PPP4R1 | PPP4C    | 0.971          |
| E2F5   | CDK4     | 0.971          |
| GNG12  | GNG13    | 0.971          |
| LAMA2  | NID1     | 0.971          |
| TCF7L2 | MYC      | 0.970          |
| KCNQ2  | ANK3     | 0.970          |
| COL4A2 | COL4A5   | 0.970          |
| P4HB   | PPIB     | 0.970          |
| IFT27  | IFT88    | 0.970          |
| MYC    | RUVBL1   | 0.970          |
| SYN1   | SNAP25   | 0.970          |
| NRXN1  | APBA1    | 0.969          |
| C5AR1  | C5       | 0.969          |
| SH3GL2 | DNM1     | 0.969          |
| IFT88  | DYNC2LI1 | 0.969          |
| STX1A  | RAB3A    | 0.969          |
| CTGF   | YAP1     | 0.968          |
| SYN1   | SYT1     | 0.968          |
| PRMT5  | SNRPD3   | 0.968          |
| IMPDH2 | GMPR     | 0.967          |
| SCN1B  | SCN3A    | 0.967          |

Table SV. Continued.

| Node 1 | Node 2  | Combined_score |
|--------|---------|----------------|
| P4HB   | PDIA6   | 0.967          |
| IQGAP1 | KDR     | 0.967          |
| CETN2  | TUBA4A  | 0.967          |
| COL5A2 | COL1A1  | 0.967          |
| KDELR1 | TMED10  | 0.967          |
| STX18  | VAMP8   | 0.967          |
| CXCR4  | CCL2    | 0.967          |
| FLNA   | PAK1    | 0.967          |
| WDR77  | SNRPD3  | 0.967          |
| PCNA   | ERCC1   | 0.966          |
| RIMS1  | SNAP25  | 0.966          |
| RGS1   | GNAO1   | 0.966          |
| NRAS   | KIT     | 0.966          |
| CDK4   | WDR77   | 0.966          |
| DOLK   | DPAGT1  | 0.966          |
| CASP7  | FAS     | 0.965          |
| COL4A1 | PLOD3   | 0.965          |
| CDK1   | TTK     | 0.965          |
| NOTCH2 | JAG1    | 0.965          |
| DNM1   | SYT1    | 0.965          |
| DNAJC6 | SNAP91  | 0.965          |
| SH3GL2 | SNAP91  | 0.964          |
| COL5A1 | COL1A2  | 0.964          |
| TKTL1  | ALDOC   | 0.964          |
| FAS    | FAIM2   | 0.964          |
| SMC4   | CCNB1   | 0.964          |
| PRMT5  | CDK4    | 0.964          |
| COL3A1 | COL6A2  | 0.964          |
| TCF7L2 | HDAC1   | 0.964          |
| PCNA   | BARD1   | 0.963          |
| TCTN1  | B9D1    | 0.962          |
| HDAC1  | TCF7L1  | 0.962          |
| AAK1   | SNAP91  | 0.962          |
| NOTCH2 | HES1    | 0.962          |
| CTGF   | WWTR1   | 0.961          |
| PTTG1  | CCNB1   | 0.961          |
| HLA-B  | HLA-C   | 0.961          |
| PENK   | FOS     | 0.961          |
| MCM2   | CCNA1   | 0.961          |
| IFT27  | IFT57   | 0.960          |
| COL5A1 | COL3A1  | 0.960          |
| INHBB  | ACVR1   | 0.960          |
| TCTN3  | B9D1    | 0.960          |
| SCN1B  | SCN2B   | 0.959          |
| SCG5   | PCSK2   | 0.959          |
| AK5    | NME5    | 0.959          |
| CDH2   | GRIA2   | 0.959          |
| TTC30A | IFT57   | 0.959          |
| E2F5   | CDK1    | 0.959          |
| PLCB4  | ITPR1   | 0.959          |
| GNG3   | GNAO1   | 0.959          |
| CDK1   | NUP37   | 0.958          |
| COL6A2 | COL1A2  | 0.958          |
| PAK6   | ARHGEF6 | 0.958          |
| DNM1   | SNAP91  | 0.958          |
| SCN1B  | ANK3    | 0.958          |
| E2F5   | PCNA    | 0.957          |
| SYT1   | SLC17A7 | 0.957          |
| COL5A2 | COL5A1  | 0.957          |

Table SV. Continued.

| Node 1  | Node 2   | Combined_score |
|---------|----------|----------------|
| PCNA    | RAD51AP1 | 0.956          |
| CTNNA1  | TJP1     | 0.956          |
| NRXN1   | SYT1     | 0.956          |
| FANCF   | ERCC1    | 0.956          |
| SCN8A   | ANK3     | 0.956          |
| CACNA1B | CACNG2   | 0.956          |
| KDELR1  | STX18    | 0.956          |
| PAK7    | ARHGEF6  | 0.956          |
| AK1     | NME5     | 0.956          |
| SSR4    | SEC11A   | 0.955          |
| SEC11A  | SEC61A1  | 0.955          |
| VAMP2   | SYN1     | 0.955          |
| SNAP25  | SLC17A7  | 0.955          |
| NRAS    | PAK1     | 0.955          |
| RPH3A   | RAB3A    | 0.955          |
| ITGA6   | CD9      | 0.955          |
| AMPD3   | IMPDH2   | 0.954          |
| MAPRE1  | BUB1B    | 0.954          |
| APBA1   | STX1A    | 0.954          |
| RIMS2   | RAB3A    | 0.954          |
| SNAP91  | SYT1     | 0.954          |
| HDAC1   | RUVBL1   | 0.954          |
| CAMK2B  | PPP3CA   | 0.954          |
| UBE2C   | TYMS     | 0.954          |
| HDAC1   | HMG20B   | 0.954          |
| KCNAB1  | KCND2    | 0.954          |
| HLA-A   | CALR     | 0.954          |
| TTK     | SMC4     | 0.953          |
| SCN3A   | SCN2B    | 0.953          |
| CAMKK2  | CAMK4    | 0.953          |
| WWTR1   | TEAD3    | 0.953          |
| TTC30A  | IFT88    | 0.953          |
| CDK1    | TUBB4A   | 0.953          |
| VAMP8   | SYT1     | 0.953          |
| SCN2A   | SCN2B    | 0.952          |
| PENK    | SST      | 0.952          |
| FBLN5   | FBN1     | 0.952          |
| FANCF   | HES1     | 0.952          |
| ISG15   | PSMB8    | 0.952          |
| GSTP1   | PRDX6    | 0.952          |
| IFT88   | KIF3C    | 0.951          |
| CDK1    | TUBA4A   | 0.951          |
| AK1     | RRM2     | 0.951          |
| PIIB    | COL1A1   | 0.951          |
| AGPAT5  | PPAP2A   | 0.951          |
| RIMS1   | STX1A    | 0.951          |
| DNAJC6  | AMPH     | 0.951          |
| L1CAM   | ANK1     | 0.951          |
| IFT57   | DYNC2LI1 | 0.951          |
| FN1     | VEGFC    | 0.950          |
| KCNN3   | KCNMB4   | 0.950          |
| CETN2   | TUBB4A   | 0.950          |
| COL6A2  | COL1A1   | 0.950          |
| RAPGEF4 | PCLO     | 0.950          |
| NPHP1   | B9D1     | 0.950          |
| LAMA1   | LAMB2    | 0.950          |
| HDAC1   | CDK4     | 0.950          |
| CDK1    | KIF20A   | 0.950          |
| CENPF   | NUP107   | 0.949          |

Table SV. Continued.

| Node 1   | Node 2   | Combined_score |
|----------|----------|----------------|
| RRM2     | AK5      | 0.949          |
| KCNAB1   | KCNC1    | 0.949          |
| GPC4     | GLCE     | 0.949          |
| MYC      | TCF7L1   | 0.949          |
| SLC25A4  | PPIF     | 0.949          |
| RRM2     | NME5     | 0.949          |
| SNAP91   | VAMP2    | 0.949          |
| ARRB1    | CXCR4    | 0.949          |
| LAMB2    | ITGB4    | 0.948          |
| HLA-A    | PSMB8    | 0.948          |
| LAMB2    | LAMC1    | 0.948          |
| SCN1B    | SCN8A    | 0.948          |
| HNRNPF   | EIF4A3   | 0.948          |
| EIF4A3   | SNRPD3   | 0.948          |
| RIMS1    | SYT1     | 0.948          |
| VAMP2    | SLC17A7  | 0.948          |
| LAMA2    | LAMB2    | 0.948          |
| COL1A2   | PLOD2    | 0.947          |
| SCN1A    | ANK3     | 0.947          |
| CACNB4   | CACNG2   | 0.947          |
| SSR4     | SEC61A1  | 0.947          |
| COL4A1   | PLOD2    | 0.947          |
| GNG5     | GNAO1    | 0.947          |
| HDAC1    | ZNF217   | 0.947          |
| CYR61    | FOS      | 0.947          |
| EXT2     | GPC4     | 0.946          |
| HLA-C    | CALR     | 0.946          |
| CTNNA1   | IQGAP1   | 0.946          |
| PCNA     | CCNB1    | 0.946          |
| SST      | OPRK1    | 0.946          |
| FOS      | TIMP1    | 0.946          |
| HOXB3    | EGR2     | 0.946          |
| CD44     | FN1      | 0.946          |
| SCP2     | HSD17B10 | 0.946          |
| COL4A1   | COL3A1   | 0.946          |
| HSD17B6  | SRD5A1   | 0.946          |
| MFAP2    | LOX      | 0.946          |
| HLA-B    | PSMB8    | 0.945          |
| PLOD2    | COL1A1   | 0.945          |
| UBE2C    | CCNA1    | 0.945          |
| TCTN1    | NPHP1    | 0.945          |
| GNAO1    | GNB5     | 0.945          |
| TTK      | CCNB1    | 0.945          |
| ALDH7A1  | GAD1     | 0.945          |
| PIIB     | COL1A2   | 0.944          |
| SOX2     | SALL1    | 0.944          |
| L1CAM    | EZR      | 0.944          |
| PTTG1    | BUB1B    | 0.944          |
| E2F5     | HDAC1    | 0.944          |
| ENO2     | ALDOC    | 0.944          |
| FN1      | TIMP1    | 0.944          |
| P4HB     | COL1A1   | 0.943          |
| RIMS1    | SYN1     | 0.943          |
| SERPINH1 | COL1A1   | 0.943          |
| COL5A1   | COL6A2   | 0.943          |
| SERPINH1 | COL1A2   | 0.943          |
| GNB5     | GNG13    | 0.943          |
| DNAJC6   | DNM1     | 0.943          |
| PRKAR1B  | ADCY1    | 0.943          |

Table SV. Continued.

| Node 1  | Node 2   | Combined_score |
|---------|----------|----------------|
| COL4A1  | COL5A2   | 0.942          |
| PSMB8   | SHFM1    | 0.942          |
| TOB1    | CPEB3    | 0.942          |
| DGKZ    | PLCB4    | 0.942          |
| SCN8A   | SCN2B    | 0.942          |
| PUF60   | HNRNPF   | 0.942          |
| AAK1    | DNAJC6   | 0.942          |
| ANXA2   | ANXA1    | 0.941          |
| DNM1    | VAMP2    | 0.941          |
| CXCR4   | CCL4     | 0.941          |
| GPX7    | P4HB     | 0.941          |
| GUCY1A2 | GUCY1B3  | 0.941          |
| ABL1    | WASF1    | 0.941          |
| COL4A5  | COL1A2   | 0.941          |
| PRKAR1B | PRKX     | 0.941          |
| GAD1    | SNAP25   | 0.941          |
| PLCB4   | GNAO1    | 0.941          |
| L1CAM   | MSN      | 0.941          |
| GNG12   | GNAO1    | 0.941          |
| CDK1    | TYMS     | 0.941          |
| HDAC1   | PRMT5    | 0.941          |
| FANCF   | BARD1    | 0.941          |
| E2F5    | MYC      | 0.940          |
| ITGA6   | LAMB2    | 0.940          |
| PPP3CA  | DNM1     | 0.940          |
| CDH12   | CDH18    | 0.940          |
| HLA-A   | HLA-C    | 0.940          |
| AMPH    | SYT1     | 0.940          |
| STK3    | WWTR1    | 0.940          |
| SNAP91  | REPS2    | 0.940          |
| CCNB1   | NUP37    | 0.940          |
| SCN3A   | ANK3     | 0.940          |
| WWTR1   | YAP1     | 0.940          |
| PENK    | OPRK1    | 0.940          |
| GABRG2  | GABRA1   | 0.940          |
| ITGA7   | LAMA2    | 0.940          |
| GOT1    | AGA      | 0.940          |
| ROR2    | FZD6     | 0.940          |
| CETN2   | NPHP1    | 0.940          |
| COL4A1  | COL1A1   | 0.939          |
| SYN1    | STX1A    | 0.939          |
| TMED10  | KDEL2    | 0.939          |
| POLI    | ISG15    | 0.939          |
| SH3GL2  | SYT1     | 0.939          |
| VAMP2   | VAMP8    | 0.939          |
| CASP7   | VIM      | 0.939          |
| VAMP8   | VAMP3    | 0.938          |
| HDAC1   | HES1     | 0.938          |
| CALB2   | PVALB    | 0.938          |
| BDNF    | CDH2     | 0.938          |
| SPTBN2  | ANK3     | 0.938          |
| RRM2    | CCNB1    | 0.938          |
| NRAS    | YES1     | 0.938          |
| DDOST   | SEC11A   | 0.938          |
| FN1     | LGALS3BP | 0.938          |
| TF      | SNAP91   | 0.938          |
| AAK1    | AMPH     | 0.938          |
| P4HB    | COL1A2   | 0.938          |
| HLA-C   | PSMB8    | 0.937          |

Table SV. Continued.

| Node 1   | Node 2   | Combined_score |
|----------|----------|----------------|
| CDK1     | HDAC1    | 0.937          |
| COL5A1   | PLOD2    | 0.937          |
| CTNNA1   | CDH10    | 0.937          |
| TF       | AMPH     | 0.937          |
| KIF20A   | CCNB1    | 0.937          |
| MAPT     | CDK5R1   | 0.937          |
| ADCY1    | GNAO1    | 0.937          |
| COL4A1   | COL1A2   | 0.936          |
| NRAS     | PRKCB    | 0.936          |
| RIMS1    | VAMP2    | 0.936          |
| COL5A2   | COL6A2   | 0.936          |
| CENPF    | NUP37    | 0.936          |
| GABRB2   | GABRA1   | 0.936          |
| TRAM1    | SEC61A1  | 0.936          |
| CAT      | DECR1    | 0.936          |
| COL4A2   | PLOD2    | 0.936          |
| MIS12    | CENPF    | 0.936          |
| ACTL6A   | CETN2    | 0.936          |
| COL4A1   | COL5A1   | 0.935          |
| KCNAB1   | KCNQ2    | 0.935          |
| P4HB     | PLOD3    | 0.935          |
| COL4A2   | COL3A1   | 0.935          |
| MYC      | FOS      | 0.935          |
| TYMS     | MCM2     | 0.935          |
| MYC      | LGALS1   | 0.935          |
| COL3A1   | PLOD2    | 0.935          |
| PLCD1    | DGKZ     | 0.935          |
| COL1A2   | PLOD3    | 0.935          |
| DGKZ     | PLCE1    | 0.935          |
| AMPH     | VAMP2    | 0.935          |
| FLNC     | ITGB4    | 0.935          |
| SNRPG    | NUP37    | 0.934          |
| TF       | VAMP3    | 0.934          |
| NRXN3    | LRRTM2   | 0.934          |
| VAMP2    | PPFIA4   | 0.934          |
| GEMIN8   | SNRPD3   | 0.934          |
| DERA     | RBKS     | 0.934          |
| FBLN2    | MFAP2    | 0.934          |
| SERPINH1 | COL3A1   | 0.934          |
| GABRG2   | GABRB2   | 0.934          |
| CETN2    | ERCC1    | 0.934          |
| PRKCZ    | PRKCB    | 0.934          |
| ISG15    | IFI44L   | 0.934          |
| COL1A1   | PLOD3    | 0.934          |
| MSN      | EZR      | 0.934          |
| WWTR1    | TJP1     | 0.934          |
| TF       | VAMP2    | 0.933          |
| SNAP91   | VAMP3    | 0.933          |
| APBA1    | SNAP25   | 0.933          |
| TTC30A   | DYNC2LI1 | 0.933          |
| GABRA2   | GABRB2   | 0.933          |
| COL4A2   | COL1A2   | 0.933          |
| CDK5R1   | PAK1     | 0.933          |
| MFAP4    | FBLN1    | 0.933          |
| AMPD3    | AK1      | 0.933          |
| COL4A2   | COL1A1   | 0.933          |
| SPTBN2   | ANK1     | 0.933          |
| RAB3A    | SLC17A7  | 0.932          |
| AMPD3    | GMPT     | 0.932          |

Table SV. Continued.

| Node 1   | Node 2   | Combined_score |
|----------|----------|----------------|
| LRRTM2   | NRXN2    | 0.932          |
| SERPINH1 | PPIB     | 0.932          |
| HDAC1    | AES      | 0.932          |
| MFAP4    | MFAP2    | 0.932          |
| GPC4     | NDST3    | 0.932          |
| LAMA1    | LAMC1    | 0.932          |
| CACNG2   | ADAM23   | 0.932          |
| COL3A1   | PLOD3    | 0.932          |
| RAB13    | VAMP2    | 0.932          |
| KCNJ9    | GABBR2   | 0.932          |
| COL4A2   | PLOD3    | 0.931          |
| VAMP2    | VAMP3    | 0.931          |
| UBE2C    | BARD1    | 0.931          |
| L1CAM    | ANK3     | 0.931          |
| GAD1     | SYT1     | 0.931          |
| CD44     | ANK1     | 0.931          |
| YES1     | EFNB3    | 0.931          |
| TF       | DNM1     | 0.931          |
| MFAP4    | FBLN5    | 0.931          |
| MIS12    | NUP107   | 0.931          |
| PI4KA    | CCNB1    | 0.931          |
| GRM3     | GABBR2   | 0.931          |
| HLA-B    | CALR     | 0.930          |
| DLG2     | HOMER1   | 0.930          |
| ABL1     | BARD1    | 0.930          |
| GABRG2   | GABRA2   | 0.930          |
| MFAP2    | FBLN5    | 0.930          |
| COL4A5   | PLOD3    | 0.930          |
| PI4KA    | CDK1     | 0.930          |
| ABL1     | CDK4     | 0.930          |
| COL4A5   | PLOD2    | 0.930          |
| RIMS1    | SLC17A7  | 0.929          |
| HNRNPF   | SNRPD3   | 0.929          |
| VEGFC    | TIMP1    | 0.929          |
| GABRG2   | GABRB1   | 0.929          |
| NRXN1    | DLG2     | 0.929          |
| HLA-DPA1 | HLA-G    | 0.929          |
| REPS2    | AMPH     | 0.929          |
| MFAP2    | FBLN1    | 0.929          |
| STX18    | TMED10   | 0.929          |
| ITGA7    | LAMB2    | 0.928          |
| COL5A1   | PLOD3    | 0.928          |
| CDK1     | NUP107   | 0.928          |
| CAMK2B   | GRIA2    | 0.928          |
| COL5A1   | SERPINH1 | 0.928          |
| TF       | REPS2    | 0.928          |
| ANK3     | SCN2B    | 0.928          |
| ARRB1    | TF       | 0.928          |
| KIF3C    | IFT57    | 0.928          |
| PSMB8    | HLA-G    | 0.928          |
| GABRA2   | GABRB1   | 0.928          |
| HDAC1    | ABL1     | 0.928          |
| HLA-DPA1 | HLA-A    | 0.928          |
| COL5A2   | COL4A2   | 0.928          |
| CERS2    | PPAP2A   | 0.928          |
| HSD17B6  | ALDH1A1  | 0.928          |
| ADRB2    | ADCY1    | 0.927          |
| CXCR4    | SST      | 0.927          |
| ZWINT    | NUP37    | 0.927          |

Table SV. Continued.

| Node 1   | Node 2   | Combined_score |
|----------|----------|----------------|
| CDK1     | CDK4     | 0.927          |
| CDK1     | MIS12    | 0.927          |
| COL4A1   | SERPINH1 | 0.927          |
| STX1A    | SLC17A7  | 0.927          |
| GABRB1   | GABRA1   | 0.927          |
| LAMA2    | LAMC1    | 0.927          |
| BUB1B    | CCNA1    | 0.926          |
| COL4A5   | COL1A1   | 0.926          |
| BUB1B    | NUP107   | 0.926          |
| NEDD4L   | FBXW7    | 0.926          |
| GAD1     | ALDH9A1  | 0.926          |
| SEC11A   | TRAM1    | 0.926          |
| CD44     | HLA-A    | 0.926          |
| AAK1     | DNM1     | 0.926          |
| PRK CZ   | CTNNA1   | 0.925          |
| SSR4     | TRAM1    | 0.925          |
| CKS1B    | CDK4     | 0.925          |
| MIS12    | CCNB1    | 0.925          |
| LAMA2    | ITGA6    | 0.925          |
| BUB1B    | NUP37    | 0.925          |
| PRKCB    | DECR1    | 0.925          |
| MFAP2    | LOXL1    | 0.925          |
| NRXN1    | STXBP1   | 0.925          |
| LAMC1    | ITGB4    | 0.925          |
| B4GALNT1 | ST8SIA5  | 0.925          |
| FBLN2    | MFAP4    | 0.925          |
| STX18    | KDEL R2  | 0.925          |
| ACTL6A   | PRMT5    | 0.925          |
| CPLX2    | VAMP2    | 0.925          |
| RBBP8    | ERCC1    | 0.924          |
| COL5A2   | PLOD2    | 0.924          |
| P4HB     | SEC61A1  | 0.924          |
| HMG N1   | PCNA     | 0.924          |
| CXCR4    | GNAO1    | 0.924          |
| TF       | ADRB2    | 0.924          |
| PTRF     | CAV1     | 0.924          |
| KIF20A   | TPX2     | 0.924          |
| SLIT2    | ABL1     | 0.924          |
| COL5A1   | COL4A2   | 0.924          |
| SCN8A    | ANK1     | 0.924          |
| ITGA6    | LAMA1    | 0.924          |
| APBA1    | RAB3A    | 0.924          |
| SGPL1    | PPAP2A   | 0.923          |
| PI4KA    | PLCD1    | 0.923          |
| PROS1    | TIMP1    | 0.923          |
| COL4A2   | COL6A2   | 0.923          |
| KCNJ6    | GABBR2   | 0.923          |
| ELAVL2   | HNRNPF   | 0.923          |
| ARRB1    | DNM1     | 0.923          |
| POLR2G   | SNRPD3   | 0.923          |
| BARD1    | CCNA1    | 0.923          |
| NRXN1    | DLGAP1   | 0.923          |
| KIF4A    | TPX2     | 0.923          |
| HLA-DRA  | HLA-A    | 0.922          |
| HLA-B    | HLA-DRA  | 0.922          |
| CDK1     | CETN2    | 0.922          |
| GAD1     | VAMP2    | 0.922          |
| ARRB1    | SNAP91   | 0.922          |
| ACTL6A   | CDK4     | 0.922          |

Table SV. Continued.

| Node 1   | Node 2   | Combined_score |
|----------|----------|----------------|
| TCF7L2   | FOS      | 0.922          |
| CD44     | HLA-G    | 0.922          |
| NRAS     | IQGAP1   | 0.922          |
| CAMK2B   | MAPT     | 0.922          |
| COL5A2   | SERPINH1 | 0.922          |
| SH3GL2   | VAMP2    | 0.922          |
| YES1     | KIT      | 0.921          |
| SERPINH1 | COL4A5   | 0.921          |
| PROS1    | SERPING1 | 0.921          |
| DNM1     | ADRB2    | 0.921          |
| NRXN2    | APBA1    | 0.921          |
| COL4A2   | SERPINH1 | 0.921          |
| ITGA6    | MYC      | 0.921          |
| HLA-B    | HLA-DPA1 | 0.921          |
| CCNB1    | NUP107   | 0.921          |
| FOXMI    | CCNA1    | 0.921          |
| HLA-DPA1 | HLA-DMA  | 0.921          |
| PUF60    | EIF4A3   | 0.921          |
| DNM1     | VAMP3    | 0.920          |
| DLG2     | NRXN3    | 0.920          |
| SNAP91   | VAMP8    | 0.920          |
| ABL1     | CDH2     | 0.920          |
| RHOBTB3  | VAMP3    | 0.920          |
| GRM3     | ADCY1    | 0.920          |
| TCTN1    | TCTN3    | 0.920          |
| P4HB     | PLOD2    | 0.920          |
| CTNNA1   | CDH18    | 0.920          |
| SERPINH1 | COL6A2   | 0.920          |
| ITGA6    | LAMC1    | 0.920          |
| TKTL1    | RBKS     | 0.919          |
| SERPING1 | LGALS3BP | 0.919          |
| COL4A1   | COL4A5   | 0.919          |
| EDNRA    | COL3A1   | 0.919          |
| MAPRE1   | CCNB1    | 0.919          |
| CDK1     | MAPRE1   | 0.919          |
| GABRG2   | GABRB3   | 0.919          |
| GABRB2   | GABRA4   | 0.919          |
| LAMA1    | ITGB4    | 0.919          |
| PROS1    | FN1      | 0.919          |
| NPHP1    | TCTN3    | 0.919          |
| HLA-DPA1 | HLA-C    | 0.919          |
| IIFT27   | DYNC2LI1 | 0.919          |
| IIFT27   | TTC30A   | 0.919          |
| GPC4     | BGN      | 0.919          |
| NRXN3    | SYT1     | 0.919          |
| GABRB3   | GABRA4   | 0.919          |
| GABRA2   | GABRA1   | 0.919          |
| NRAS     | FN1      | 0.919          |
| TPX2     | CCNB1    | 0.919          |
| SST      | GABBR2   | 0.919          |
| GABRB1   | GABRA4   | 0.919          |
| ITGA7    | LAMC1    | 0.918          |
| TKTL1    | ENO2     | 0.918          |
| POLR2G   | LSM7     | 0.918          |
| SCN3A    | ANK1     | 0.918          |
| TF       | DNAJC6   | 0.918          |
| DLG2     | NRXN2    | 0.918          |
| BARD1    | ERCC1    | 0.918          |
| RIMS1    | APBA1    | 0.918          |

Table SV. Continued.

| Node 1  | Node 2   | Combined_score |
|---------|----------|----------------|
| HLA-DRA | HLA-C    | 0.918          |
| KCNQ2   | SPTBN2   | 0.918          |
| FOXMI   | MELK     | 0.918          |
| APBA1   | SYT1     | 0.918          |
| MYC     | COL1A2   | 0.918          |
| DNAJC6  | SH3GL2   | 0.918          |
| HDAC1   | CCNA1    | 0.918          |
| COL4A1  | COL6A2   | 0.918          |
| GABRA2  | GABRB3   | 0.917          |
| ITGA7   | TNC      | 0.917          |
| NOTCH2  | PSENEN   | 0.917          |
| NRXN2   | SYT1     | 0.917          |
| DNM1    | VAMP8    | 0.917          |
| PI4KA   | MTM1     | 0.917          |
| HLA-B   | HLA-A    | 0.917          |
| LOXL1   | LOX      | 0.917          |
| EZR     | ADRB2    | 0.917          |
| ABL1    | CTNNA1   | 0.917          |
| HLA-G   | CALR     | 0.917          |
| FBXW7   | WSB1     | 0.917          |
| COL9A2  | PLOD2    | 0.917          |
| DNAJC6  | SYT1     | 0.917          |
| EIF4A3  | NUP107   | 0.917          |
| FOS     | IGFBP7   | 0.917          |
| GABRB3  | GABRA1   | 0.917          |
| CDH18   | CDH10    | 0.917          |
| RIMS1   | PPFIA4   | 0.917          |
| ITPR1   | PLCE1    | 0.917          |
| KIF4A   | KIF3C    | 0.916          |
| PRKAR1B | CDK4     | 0.916          |
| YES1    | PAK1     | 0.916          |
| CACNB4  | CACNA1B  | 0.916          |
| KIF13B  | KIF3C    | 0.916          |
| KIF20A  | FOXMI    | 0.916          |
| TF      | SYT1     | 0.916          |
| UNC13A  | RIMS2    | 0.916          |
| COL4A5  | COL3A1   | 0.916          |
| ITGA7   | LAMA1    | 0.916          |
| HMGNI   | ERCC1    | 0.916          |
| TF      | VAMP8    | 0.916          |
| TF      | SH3GL2   | 0.916          |
| BARD1   | RAD51AP1 | 0.916          |
| ZWINT   | NUP107   | 0.916          |
| LAMA2   | ITGB4    | 0.916          |
| ITPR1   | SNAP25   | 0.916          |
| CXCR4   | CXCR7    | 0.916          |
| GSTP1   | GPX7     | 0.915          |
| DNM1    | GABRA2   | 0.915          |
| COL9A2  | PLOD3    | 0.915          |
| HLA-C   | HLA-G    | 0.915          |
| AMPH    | VAMP3    | 0.915          |
| NRXN3   | APBA1    | 0.915          |
| BUB1B   | SHFM1    | 0.915          |
| SLIT2   | PAK1     | 0.915          |
| SCN2A   | ANK1     | 0.915          |
| COL5A2  | PLOD3    | 0.915          |
| NRXN1   | STX1A    | 0.915          |
| LPCAT4  | AGPAT5   | 0.915          |
| PLIN3   | VAMP3    | 0.915          |

Table SV. Continued.

| Node 1   | Node 2   | Combined_score |
|----------|----------|----------------|
| ODF2     | B9D1     | 0.915          |
| MYC      | ITGB4    | 0.915          |
| ARRB1    | AMPH     | 0.915          |
| CACNB2   | CACNG2   | 0.915          |
| PSMB8    | ODC1     | 0.915          |
| SCN8A    | SPTBN2   | 0.915          |
| LGALS3BP | TIMP1    | 0.915          |
| PRMT5    | ACTL6B   | 0.915          |
| IQGAP2   | IQGAP1   | 0.915          |
| RBBP8    | CCNA1    | 0.915          |
| MELK     | CCNB1    | 0.915          |
| ID1      | HDAC1    | 0.915          |
| CDK1     | MCM2     | 0.915          |
| ARRB1    | DNAJC6   | 0.915          |
| DNM1     | GABRA1   | 0.915          |
| AAK1     | TF       | 0.915          |
| ITPR1    | PRKCB    | 0.914          |
| DDOST    | TRAM1    | 0.914          |
| GAD1     | RAB3A    | 0.914          |
| STXBP1   | NRXN2    | 0.914          |
| CD44     | HLA-C    | 0.914          |
| PPP3CA   | PPP2R3A  | 0.914          |
| AMPD3    | AK5      | 0.914          |
| DLGAP1   | NRXN2    | 0.914          |
| RGS7     | GNAO1    | 0.914          |
| ALDH7A1  | CAT      | 0.914          |
| KCNJ9    | GNG3     | 0.914          |
| CXCR4    | ANXA1    | 0.914          |
| COL9A2   | COL3A1   | 0.914          |
| RASGRP1  | ITPR1    | 0.914          |
| NRXN1    | HOMER1   | 0.914          |
| PRKCZ    | VAMP2    | 0.914          |
| HLA-B    | CD44     | 0.914          |
| ADCY1    | GNG13    | 0.914          |
| STX1A    | VAMP3    | 0.914          |
| GAD1     | STX1A    | 0.914          |
| CXCR4    | APLNR    | 0.914          |
| VAMP2    | APBA1    | 0.913          |
| KIF13B   | KIF4A    | 0.913          |
| ADCY1    | VIPR2    | 0.913          |
| EDNRA    | COL1A2   | 0.913          |
| AAK1     | SH3GL2   | 0.913          |
| SST      | APLNR    | 0.913          |
| PI4KA    | PLCE1    | 0.913          |
| GPC4     | VCAN     | 0.913          |
| PI4KA    | PLCB4    | 0.913          |
| NUP37    | SNRPD3   | 0.913          |
| PPFIA4   | APBA1    | 0.913          |
| PCNA     | POLR2G   | 0.913          |
| CAMK2B   | CAMK4    | 0.913          |
| ODF2     | CETN2    | 0.913          |
| CAMK2B   | CAV1     | 0.912          |
| GNG12    | GNB5     | 0.912          |
| GNG12    | ADRB2    | 0.912          |
| HLA-A    | HLA-G    | 0.912          |
| GABRG2   | GABRA4   | 0.912          |
| SPTBN2   | KIF3C    | 0.912          |
| HDAC1    | HIST1H4J | 0.912          |
| CACNB2   | SNAP25   | 0.912          |

Table SV. Continued.

| Node 1   | Node 2   | Combined_score |
|----------|----------|----------------|
| NRAS     | RASGRP1  | 0.912          |
| SERPING1 | TIMP1    | 0.912          |
| POLR2G   | SNRPG    | 0.912          |
| UBE2C    | FBXW7    | 0.912          |
| EDNRA    | GNG3     | 0.912          |
| CXCR4    | GABBR2   | 0.912          |
| PPFIA4   | RAB3A    | 0.912          |
| MYC      | AES      | 0.911          |
| ABL1     | CYFIP2   | 0.911          |
| COL5A1   | COL4A5   | 0.911          |
| SNRPG    | NUP107   | 0.911          |
| CXCR4    | ADRB2    | 0.911          |
| EIF4A3   | NUP37    | 0.911          |
| SH3GL2   | VAMP3    | 0.911          |
| GNG5     | PLCB4    | 0.911          |
| SPOCK3   | TIMP2    | 0.911          |
| HLA-A    | VAMP3    | 0.911          |
| MIS12    | NUP37    | 0.911          |
| GRM3     | SST      | 0.911          |
| NME5     | GUCY1B3  | 0.911          |
| CXCR4    | OPRK1    | 0.911          |
| CXCR4    | DNM1     | 0.911          |
| PMF1     | BUB1B    | 0.911          |
| VAMP8    | STX1A    | 0.911          |
| CETN2    | TPX2     | 0.911          |
| KCNQ2    | ANK1     | 0.911          |
| PLCB4    | EDNRA    | 0.911          |
| DERA     | TKTL1    | 0.911          |
| GUCY1A2  | NME5     | 0.911          |
| CXCR4    | GNG5     | 0.910          |
| PLCD1    | ITPR1    | 0.910          |
| MYOF     | KDR      | 0.910          |
| GNG5     | CXCR7    | 0.910          |
| CXCR4    | GNG12    | 0.910          |
| CTGF     | TEAD3    | 0.910          |
| STXBP1   | NRXN3    | 0.910          |
| GNG3     | CXCR7    | 0.910          |
| GNG5     | OPRK1    | 0.910          |
| HLA-DPA1 | GBP1     | 0.910          |
| HLA-B    | VAMP3    | 0.910          |
| GNG5     | EDNRA    | 0.910          |
| PENK     | GABBR2   | 0.910          |
| EDNRA    | GNG13    | 0.910          |
| SNCA     | YES1     | 0.910          |
| VAMP2    | ITPR1    | 0.910          |
| MYC      | SERPINI1 | 0.910          |
| GNG3     | APLNR    | 0.910          |
| ADRB2    | GNG3     | 0.910          |
| COL5A2   | COL4A5   | 0.910          |
| P4HB     | COL3A1   | 0.910          |
| ODF2     | TUBB4A   | 0.910          |
| GNG12    | APLNR    | 0.910          |
| CXCR4    | GNG13    | 0.910          |
| SCN1A    | ANK1     | 0.910          |
| GNG5     | APLNR    | 0.910          |
| POLR2G   | EIF4A3   | 0.910          |
| CXCR4    | GNG3     | 0.910          |
| CXCR7    | GNG13    | 0.910          |
| PLCD1    | MTM1     | 0.910          |



Table SV. Continued.

| Node 1  | Node 2   | Combined_score |
|---------|----------|----------------|
| PSMB9   | ODC1     | 0.910          |
| PROS1   | LGALS3BP | 0.910          |
| SLIT2   | PAK6     | 0.910          |
| AAK1    | REPS2    | 0.910          |
| HLA-DRA | GBP1     | 0.910          |
| OPRK1   | GNG13    | 0.910          |
| GNG3    | OPRK1    | 0.910          |
| CDH12   | CTNNA1   | 0.910          |
| COL4A5  | COL6A2   | 0.910          |
| GNG12   | CXCR7    | 0.910          |
| ADRB2   | GNG13    | 0.910          |
| RAPGEF4 | IQGAP1   | 0.910          |
| C5AR1   | ANXA1    | 0.910          |
| GNG5    | ADRB2    | 0.910          |
| APLNR   | GNG13    | 0.910          |
| COL9A2  | BGN      | 0.910          |
| GNG12   | OPRK1    | 0.910          |
| PLCD1   | PLCE1    | 0.910          |
| GNG12   | EDNRA    | 0.910          |
| CDK4    | ACTL6B   | 0.910          |
| NEDD4L  | UBE2C    | 0.909          |
| FN1     | SERPING1 | 0.909          |
| GNG3    | GABBR2   | 0.909          |
| CDK1    | PSMB8    | 0.909          |
| ADRB2   | VIPR2    | 0.909          |
| KIF20A  | SPTBN2   | 0.909          |
| PRKCZ   | NRAS     | 0.909          |
| CDH12   | CDH2     | 0.909          |
| PPFIA4  | SYT1     | 0.909          |
| RBBP8   | RAD51AP1 | 0.909          |
| CAMK2B  | NRAS     | 0.909          |
| MDK     | NOTCH2   | 0.908          |
| ISG15   | HLA-A    | 0.908          |
| TUBB4A  | B9D1     | 0.908          |
| FAS     | NMI      | 0.908          |
| GRM3    | GNG3     | 0.908          |
| EIF4A3  | LSM7     | 0.908          |
| HLA-B   | ISG15    | 0.908          |
| PDE1A   | GMPR     | 0.908          |
| HDAC1   | FAM60A   | 0.908          |
| LPCAT4  | PEMT     | 0.908          |
| CDH18   | CDH2     | 0.908          |
| ISG15   | HLA-C    | 0.908          |
| FBXL7   | WSB1     | 0.908          |
| GNB5    | GABBR2   | 0.908          |
| BDNF    | CTNNA1   | 0.908          |
| ITPR1   | IQGAP1   | 0.908          |
| CD44    | HLA-DRA  | 0.908          |
| SPTBN2  | SCN1A    | 0.908          |
| FOS     | TRIP6    | 0.908          |
| GNG3    | KCNJ6    | 0.908          |
| CTNNA1  | KDR      | 0.908          |
| PEX11A  | PEX12    | 0.908          |
| DNAJC6  | VAMP2    | 0.908          |
| LAMB2   | PAK1     | 0.908          |
| MAPRE1  | CETN2    | 0.908          |
| PMF1    | CDK1     | 0.908          |
| PTTG1   | SHFM1    | 0.908          |
| PRKAR1B | ADRB2    | 0.908          |

Table SV. Continued.

| Node 1   | Node 2   | Combined_score |
|----------|----------|----------------|
| PLCB4    | PLCE1    | 0.908          |
| SST      | CXCR7    | 0.907          |
| HLA-B    | GBP1     | 0.907          |
| SPTBN2   | SCN2A    | 0.907          |
| NRXN1    | NRXN3    | 0.907          |
| HLA-DPA1 | HLA-DRA  | 0.907          |
| MAMLD1   | MYC      | 0.907          |
| FOS      | AKR7A2   | 0.907          |
| NRXN2    | STX1A    | 0.907          |
| SH3GL2   | ADRB2    | 0.907          |
| ASUN     | SNAPC1   | 0.907          |
| SLIT2    | PAK7     | 0.907          |
| AP1S2    | VAMP2    | 0.907          |
| POLR2G   | SNAPC1   | 0.907          |
| CDH2     | CDH10    | 0.907          |
| HNRNPF   | POLR2G   | 0.907          |
| AAK1     | VAMP2    | 0.907          |
| AZIN1    | ODC1     | 0.907          |
| TCF7L2   | RUVBL1   | 0.907          |
| LPCAT4   | LPCAT1   | 0.907          |
| B9D1     | TUBA4A   | 0.907          |
| PLCB4    | GNB5     | 0.907          |
| CYFIP2   | ELMO1    | 0.907          |
| UGT8     | CERS2    | 0.907          |
| GNG12    | PLCB4    | 0.907          |
| KDELRL1  | KDELRL2  | 0.907          |
| PTTG1    | TPX2     | 0.907          |
| AMPH     | VAMP8    | 0.907          |
| STXBP1   | CACNB2   | 0.907          |
| FN1      | IQGAP1   | 0.907          |
| CXCR4    | C5AR1    | 0.907          |
| PAK7     | PAK6     | 0.907          |
| KIF3C    | DYNC2LI1 | 0.907          |
| KIF4A    | SPTBN2   | 0.907          |
| GRM3     | PENK     | 0.907          |
| CXCR4    | C5       | 0.907          |
| COL5A2   | COL9A2   | 0.907          |
| ELMO1    | PAK1     | 0.907          |
| RAPGEF4  | PRKAR1B  | 0.907          |
| MAPRE1   | ODF2     | 0.907          |
| NUP107   | SNRPD3   | 0.906          |
| KIF20A   | CENPF    | 0.906          |
| STMN4    | TUBB4A   | 0.906          |
| COL5A1   | P4HB     | 0.906          |
| COL4A1   | P4HB     | 0.906          |
| NRAS     | SPTBN2   | 0.906          |
| COL9A2   | COL5A1   | 0.906          |
| HLA-C    | GBP1     | 0.906          |
| FBXL7    | UBE2C    | 0.906          |
| HLA-A    | GBP1     | 0.906          |
| HNRNPF   | SNRPG    | 0.906          |
| DNM1     | JAG1     | 0.906          |
| CNKSR2   | NRAS     | 0.906          |
| PAK1     | PAK6     | 0.906          |
| FZD6     | GNAO1    | 0.906          |
| CDH12    | CDH10    | 0.906          |
| GRM3     | GNB5     | 0.906          |
| DNM1     | AP1S2    | 0.906          |
| DNAJC6   | VAMP3    | 0.906          |

Table SV. Continued.

| Node 1  | Node 2   | Combined_score |
|---------|----------|----------------|
| HMGN1   | POLR2G   | 0.906          |
| GBP1    | HLA-G    | 0.906          |
| GNG5    | KCNJ6    | 0.906          |
| GRM3    | OPRK1    | 0.906          |
| PUF60   | LSM7     | 0.906          |
| GNG12   | KCNJ9    | 0.906          |
| CXCR4   | PENK     | 0.906          |
| SCN2B   | ANK1     | 0.906          |
| GNG5    | KCNJ9    | 0.906          |
| KIF20A  | STX18    | 0.906          |
| CAMK2B  | CAMKK2   | 0.906          |
| GNG12   | KCNJ6    | 0.906          |
| COL9A2  | COL1A1   | 0.906          |
| SCN1B   | ANK1     | 0.906          |
| SYN1    | PPFIA4   | 0.906          |
| HSD17B8 | SRD5A1   | 0.905          |
| COL4A2  | P4HB     | 0.905          |
| PAK7    | PAK1     | 0.905          |
| CETN2   | B9D1     | 0.905          |
| NRXN3   | STX1A    | 0.905          |
| NRXN3   | DLGAP1   | 0.905          |
| ITGA6   | MDK      | 0.905          |
| PIPOX   | CRYM     | 0.905          |
| RUVBL1  | TCF7L1   | 0.905          |
| MAPRE1  | TPX2     | 0.905          |
| TRIM22  | HLA-C    | 0.905          |
| PRKAR1B | EZR      | 0.905          |
| WASF1   | KDR      | 0.905          |
| ODF2    | TUBA4A   | 0.905          |
| TTC30A  | KIF3C    | 0.905          |
| MAPRE1  | NUP37    | 0.905          |
| COL9A2  | COL1A2   | 0.905          |
| STX18   | KIF3C    | 0.905          |
| ACTL6A  | WDR77    | 0.905          |
| SST     | ANXA1    | 0.905          |
| TPX2    | MELK     | 0.905          |
| PPFIA4  | SNAP25   | 0.905          |
| COL5A2  | P4HB     | 0.905          |
| PRMT5   | SNRPG    | 0.905          |
| RIMS1   | GAD1     | 0.905          |
| COL4A5  | P4HB     | 0.905          |
| YES1    | ELMO1    | 0.905          |
| PLCD1   | PLCB4    | 0.905          |
| AP1S2   | VAMP8    | 0.905          |
| KIF13B  | KIF20A   | 0.905          |
| PUF60   | POLR2G   | 0.905          |
| FBXL7   | FBXW7    | 0.904          |
| ARRB1   | SYT1     | 0.904          |
| ACVR1   | CDK4     | 0.904          |
| GNG3    | SST      | 0.904          |
| OPRK1   | GABBR2   | 0.904          |
| CALR    | PDIA4    | 0.904          |
| CD44    | GBP1     | 0.904          |
| GNG12   | GNG3     | 0.904          |
| CDH2    | BNIP2    | 0.904          |
| KIF20A  | DYNC2LI1 | 0.904          |
| ARRB1   | IQGAP1   | 0.904          |
| L1CAM   | SPTBN2   | 0.904          |
| ISG15   | HLA-G    | 0.904          |

Table SV. Continued.

| Node 1  | Node 2   | Combined_score |
|---------|----------|----------------|
| ABL1    | BNIP2    | 0.904          |
| CD44    | COL1A1   | 0.904          |
| DNAJC6  | VAMP8    | 0.904          |
| CTNNA1  | PAK1     | 0.904          |
| GUCY1A2 | PDE1A    | 0.904          |
| IFT27   | KIF3C    | 0.904          |
| UBE2C   | TPX2     | 0.904          |
| SLIT2   | PFN1     | 0.904          |
| ODF2    | NPHP1    | 0.904          |
| CXCR4   | GRM3     | 0.904          |
| HECW1   | PSMB8    | 0.904          |
| PENK    | GNG3     | 0.904          |
| KIF4A   | DYNC2LI1 | 0.904          |
| COL5A2  | PPIB     | 0.904          |
| MAPRE1  | NPHP1    | 0.904          |
| POLR2G  | NME5     | 0.904          |
| SNAP91  | ADRB2    | 0.903          |
| ADCY1   | GABBR2   | 0.903          |
| ABL1    | YES1     | 0.903          |
| CKS1B   | CCNA1    | 0.903          |
| PSMB9   | SHFM1    | 0.903          |
| SYN1    | APBA1    | 0.903          |
| PSMB8   | CCNA1    | 0.903          |
| ARRB1   | AAK1     | 0.903          |
| PDE1A   | GUCY1B3  | 0.903          |
| GNG5    | GNG3     | 0.903          |
| ANK3    | ANK1     | 0.903          |
| RAPGEF4 | RAP1GAP2 | 0.903          |
| PROS1   | VEGFC    | 0.903          |
| RUVBL1  | CCNA1    | 0.903          |
| FAM60A  | ZNF217   | 0.903          |
| COL9A2  | COL6A2   | 0.903          |
| SPTBN2  | SCN3A    | 0.903          |
| GPC4    | B3GAT1   | 0.903          |
| TCTN1   | ODF2     | 0.903          |
| KIF20A  | KIF3C    | 0.903          |
| COL9A2  | SERPINH1 | 0.903          |
| PPFIA4  | SLC17A7  | 0.903          |
| NRXN3   | HOMER1   | 0.903          |
| CDK1    | PSMB9    | 0.903          |
| PRKCB   | GRIA2    | 0.903          |
| ITPR1   | STX1A    | 0.903          |
| SH3GL2  | VAMP8    | 0.903          |
| CDK1    | KIF4A    | 0.903          |
| POLR2G  | ASUN     | 0.903          |
| CACNB2  | STX1A    | 0.903          |
| CDK1    | MELK     | 0.903          |
| GPC4    | RBP1     | 0.903          |
| MAPRE1  | ZWINT    | 0.903          |
| AMPH    | ADRB2    | 0.903          |
| PAK1    | EFNB3    | 0.903          |
| CTNNA1  | BNIP2    | 0.903          |
| GNG12   | FZD6     | 0.903          |
| LPCAT1  | PEMT     | 0.903          |
| HNRNPF  | LSM7     | 0.903          |
| PENK    | GNB5     | 0.903          |
| KIF4A   | STX18    | 0.902          |
| EDNRA   | ANXA1    | 0.902          |
| ADCY1   | OPRK1    | 0.902          |

Table SV. Continued.

| Node 1   | Node 2   | Combined_score |
|----------|----------|----------------|
| CAMK2B   | HDAC1    | 0.902          |
| PRKAR1B  | ITPR1    | 0.902          |
| VEGFC    | SERPING1 | 0.902          |
| GRM3     | APLNR    | 0.902          |
| GRM3     | C5AR1    | 0.902          |
| POLR2G   | ERCC1    | 0.902          |
| LAMA2    | PAK6     | 0.902          |
| MTM1     | PLCB4    | 0.902          |
| LAMA2    | PAK1     | 0.902          |
| GNG5     | ITPR1    | 0.902          |
| PPFIA4   | STX1A    | 0.902          |
| KIF13B   | STX18    | 0.902          |
| GRM3     | CXCR7    | 0.902          |
| GNG12    | ITPR1    | 0.902          |
| SCN1B    | SPTBN2   | 0.902          |
| LAMA2    | PAK7     | 0.902          |
| AAK1     | VAMP8    | 0.902          |
| ITPR1    | GNAO1    | 0.902          |
| PMF1     | CCNB1    | 0.902          |
| UBE2C    | SHFM1    | 0.902          |
| CDK1     | TCTN3    | 0.902          |
| ITPR1    | GNG3     | 0.902          |
| LAMA2    | LAMA1    | 0.902          |
| UGT8     | PPAP2A   | 0.902          |
| GNG5     | GABBR2   | 0.902          |
| BGN      | B3GAT1   | 0.902          |
| PAK6     | LAMC1    | 0.902          |
| AAK1     | VAMP3    | 0.902          |
| C5AR1    | CXCR7    | 0.902          |
| PAK1     | LAMC1    | 0.902          |
| CACNB2   | VAMP2    | 0.902          |
| NRXN1    | NRXN2    | 0.902          |
| PAK7     | LAMC1    | 0.902          |
| PLOD2    | PLOD3    | 0.902          |
| C5AR1    | GNG3     | 0.902          |
| GNG12    | C5AR1    | 0.902          |
| ARRB1    | SH3GL2   | 0.902          |
| DNM1     | L1CAM    | 0.902          |
| MAPKAPK3 | KDR      | 0.902          |
| CAMK2B   | CACNG2   | 0.902          |
| MTM1     | PLCE1    | 0.902          |
| ELAVL2   | EIF4A3   | 0.902          |
| ITPR1    | GNG13    | 0.902          |
| POLR2G   | EGR2     | 0.902          |
| C5AR1    | GNG13    | 0.902          |
| CTNNA1   | GRIA2    | 0.902          |
| DPYSL3   | CDK5R1   | 0.902          |
| GNG5     | C5AR1    | 0.902          |
| VIPR2    | GNB5     | 0.902          |
| ANXA1    | C5       | 0.902          |
| DNM1     | EFNB3    | 0.902          |
| SHFM1    | ODC1     | 0.901          |
| ANK1     | DYNC2LI1 | 0.901          |
| COL4A1   | PPIB     | 0.901          |
| CDK1     | SHFM1    | 0.901          |
| COL6A2   | PLOD2    | 0.901          |
| AMPD3    | PDE1A    | 0.901          |
| COL6A2   | PPIB     | 0.901          |
| ELAVL2   | SNRPD3   | 0.901          |

Table SV. Continued.

| Node 1  | Node 2   | Combined_score |
|---------|----------|----------------|
| AP1S2   | GNS      | 0.901          |
| MAPRE1  | CENPF    | 0.901          |
| DNAJC6  | AP1S2    | 0.901          |
| ARRB1   | VAMP8    | 0.901          |
| ADCY1   | GNB5     | 0.901          |
| C5AR1   | SST      | 0.901          |
| COL9A2  | COL4A2   | 0.901          |
| KIF4A   | MELK     | 0.901          |
| MAPRE1  | NUP107   | 0.901          |
| ADRB2   | GNB5     | 0.901          |
| HLA-DRA | TRIM22   | 0.901          |
| ODF2    | TCTN3    | 0.901          |
| PRKAR1B | IQGAP1   | 0.901          |
| HLA-B   | HLA-G    | 0.901          |
| AK1     | PDE1A    | 0.901          |
| CXCR7   | GABBR2   | 0.901          |
| CTSO    | HLA-DPA1 | 0.901          |
| PSMB9   | UBE2C    | 0.901          |
| NEDD4L  | TRIM9    | 0.901          |
| TPX2    | TUBB4A   | 0.901          |
| LAMB2   | PAK6     | 0.901          |
| PMF1    | CENPF    | 0.901          |
| MAMLD1  | HEY2     | 0.901          |
| COL4A5  | PPIB     | 0.901          |
| GNG12   | GNG5     | 0.901          |
| GABBR2  | GNG13    | 0.901          |
| GABBR2  | APLNR    | 0.901          |
| NPHP1   | TUBA4A   | 0.901          |
| BDNF    | DYNLT1   | 0.901          |
| ANK3    | DYNC2LI1 | 0.901          |
| HECW1   | PSMB9    | 0.901          |
| COL5A1  | PPIB     | 0.901          |
| AK5     | PDE1A    | 0.901          |
| ARRB1   | VAMP3    | 0.901          |
| ADCY1   | GNG3     | 0.901          |
| CDK1    | ODF2     | 0.901          |
| CACNB2  | GNG3     | 0.901          |
| CYFIP2  | KDR      | 0.901          |
| ELMO1   | KDR      | 0.901          |
| CTSO    | HLA-DRA  | 0.901          |
| SH3GL2  | AP1S2    | 0.901          |
| SH3GL2  | L1CAM    | 0.901          |
| PAK7    | LAMB2    | 0.901          |
| NRXN3   | NRXN2    | 0.901          |
| TMOD2   | VIM      | 0.901          |
| LPAR6   | ANXA1    | 0.901          |
| GNG12   | ANXA1    | 0.901          |
| MYC     | ALDH9A1  | 0.901          |
| PLCB4   | GNG3     | 0.901          |
| ELAVL2  | SNRPG    | 0.901          |
| FZD6    | GNG3     | 0.901          |
| P4HB    | COL6A2   | 0.901          |
| LPAR6   | PLCB4    | 0.901          |
| TPX2    | TUBA4A   | 0.901          |
| PUF60   | SNRPD3   | 0.901          |
| COL4A2  | PPIB     | 0.901          |
| HDAC1   | WDR77    | 0.901          |
| CD44    | TRIM2    | 0.901          |
| ISG15   | KIAA0101 | 0.901          |

Table SV. Continued.

| Node 1   | Node 2    | Combined_score |
|----------|-----------|----------------|
| PENK     | CXCR7     | 0.901          |
| LAMA1    | L1CAM     | 0.901          |
| CD44     | HLA-DPA1  | 0.901          |
| HLA-DPA1 | TRIM22    | 0.901          |
| PUF60    | ELAVL2    | 0.901          |
| MAPRE1   | B9D1      | 0.901          |
| CXCR4    | GNB5      | 0.901          |
| SNRPG    | EIF4A3    | 0.901          |
| ARRB1    | VAMP2     | 0.901          |
| PLCB4    | GNG13     | 0.901          |
| CACNB2   | GNB5      | 0.901          |
| L1CAM    | LAMC1     | 0.901          |
| FOLR1    | TMED10    | 0.901          |
| MIS12    | MAPRE1    | 0.901          |
| COL3A1   | PPIB      | 0.901          |
| AAK1     | SYT1      | 0.901          |
| PMF1     | NUP37     | 0.901          |
| SST      | GNB5      | 0.901          |
| DERA     | ALDOC     | 0.901          |
| CXCR7    | APLNR     | 0.901          |
| EDNRA    | GNB5      | 0.900          |
| GNG12    | LPAR6     | 0.900          |
| STXBP1   | ITPR1     | 0.900          |
| TCTN1    | TUBA4A    | 0.900          |
| PSMB9    | PTTG1     | 0.900          |
| CNKSR2   | FN1       | 0.900          |
| C5AR1    | ADCY1     | 0.900          |
| GNG12    | VIPR2     | 0.900          |
| MAPRE1   | TCTN3     | 0.900          |
| SPTBN2   | SCN2B     | 0.900          |
| CETN2    | TCTN3     | 0.900          |
| L1CAM    | KIAA1598  | 0.900          |
| ARRB1    | NRAS      | 0.900          |
| FBXL7    | TRIM9     | 0.900          |
| PSMB9    | TNFRSF12A | 0.900          |
| VEGFC    | LGALS3BP  | 0.900          |
| CNTN6    | PSENN     | 0.900          |
| UBE2C    | WSB1      | 0.900          |
| SPTBN2   | KDEL2     | 0.900          |
| KIF20A   | KDEL2     | 0.900          |
| HLA-DMA  | KIF4A     | 0.900          |
| GNG12    | GABBR2    | 0.900          |
| GNG3     | C5        | 0.900          |
| CASP7    | ITGB4     | 0.900          |
| GNG3     | VIPR2     | 0.900          |
| GNG12    | SST       | 0.900          |
| KIF4A    | TMED10    | 0.900          |
| OPRK1    | GNB5      | 0.900          |
| GNG5     | SST       | 0.900          |
| PSMB8    | UBE2C     | 0.900          |
| C5AR1    | OPRK1     | 0.900          |
| KIF20A   | KDEL2     | 0.900          |
| HLA-DRA  | SPTBN2    | 0.900          |
| CDK1     | KIAA0101  | 0.900          |
| LPAR6    | GNG13     | 0.900          |
| GNG5     | FZD6      | 0.900          |
| PRKAR1B  | ACVR1     | 0.900          |
| KIF4A    | KDEL2     | 0.900          |
| GBP1     | TRIM2     | 0.900          |

Table SV. Continued.

| Node 1   | Node 2    | Combined_score |
|----------|-----------|----------------|
| HLA-DPA1 | TRIM2     | 0.900          |
| REPS2    | VAMP2     | 0.900          |
| CCNA1    | SHFM1     | 0.900          |
| ADCY1    | APLNR     | 0.900          |
| HLA-DPA1 | DYNC2LI1  | 0.900          |
| SPTBN2   | FOLR1     | 0.900          |
| GNG3     | ANXA1     | 0.900          |
| AAK1     | ADRB2     | 0.900          |
| GNG5     | GNG13     | 0.900          |
| TMED10   | ANK3      | 0.900          |
| B4GALT4  | PRELP     | 0.900          |
| HLA-C    | TRIM2     | 0.900          |
| CXCR4    | ADCY1     | 0.900          |
| REPS2    | ADRB2     | 0.900          |
| OPRK1    | ANXA1     | 0.900          |
| HLA-DPA1 | DNM1      | 0.900          |
| ADRB2    | VAMP8     | 0.900          |
| WDR77    | ACTL6B    | 0.900          |
| COL9A2   | PPIB      | 0.900          |
| DNM1     | REPS2     | 0.900          |
| TMED10   | DYNC2LI1  | 0.900          |
| C5AR1    | APLNR     | 0.900          |
| ELAVL2   | POLR2G    | 0.900          |
| GNG12    | C5        | 0.900          |
| CNKSR2   | IQGAP1    | 0.900          |
| ANK3     | KDEL2     | 0.900          |
| ADCY1    | SST       | 0.900          |
| PSMB8    | TNFRSF12A | 0.900          |
| GNB5     | APLNR     | 0.900          |
| ADCY1    | C5        | 0.900          |
| HLA-DPA1 | KIF3C     | 0.900          |
| CETN2    | RUVBL1    | 0.900          |
| ITPR1    | GNB5      | 0.900          |
| ARRB1    | REPS2     | 0.900          |
| GUCY1A2  | POLR2G    | 0.900          |
| SST      | GNG13     | 0.900          |
| GNB5     | ANXA1     | 0.900          |
| HLA-B    | VAMP8     | 0.900          |
| SPTBN2   | DYNC2LI1  | 0.900          |
| ADCY1    | CXCR7     | 0.900          |
| ODF2     | TPX2      | 0.900          |
| NRAS     | EFNB3     | 0.900          |
| HLA-DRA  | AP1S2     | 0.900          |
| DNAJC6   | ADRB2     | 0.900          |
| DDX60    | IFI44L    | 0.900          |
| POLR2G   | GUCY1B3   | 0.900          |
| SH3GL2   | REPS2     | 0.900          |
| CCNB1    | NMI       | 0.900          |
| KIF13B   | TMED10    | 0.900          |
| GRM3     | C5        | 0.900          |
| TCTN3    | TUBA4A    | 0.900          |
| LAMA2    | ARHGEF6   | 0.900          |
| LPAR6    | GNB5      | 0.900          |
| CXCR7    | OPRK1     | 0.900          |
| HLA-DPA1 | SPTBN2    | 0.900          |
| FOLR1    | ANK1      | 0.900          |
| SH3GL2   | GNS       | 0.900          |
| GEMIN8   | SNRPG     | 0.900          |
| LPAR6    | EDNRA     | 0.900          |

Table SV. Continued.

| Node 1    | Node 2   | Combined_score |
|-----------|----------|----------------|
| PLCB4     | ANXA1    | 0.900          |
| HLA-DPA1  | KIF20A   | 0.900          |
| FOLR1     | KDELR2   | 0.900          |
| CXCR7     | ANXA1    | 0.900          |
| KIF13B    | KDELR2   | 0.900          |
| COL9A2    | P4HB     | 0.900          |
| LPAR6     | GNG3     | 0.900          |
| KIF4A     | L1CAM    | 0.900          |
| PSMB8     | BUB1B    | 0.900          |
| PSMB9     | BUB1B    | 0.900          |
| HLA-DRA   | SH3GL2   | 0.900          |
| HLA-C     | VAMP8    | 0.900          |
| HLA-DMA   | SPTBN2   | 0.900          |
| DYNC2LI1  | KDELR2   | 0.900          |
| KDELR1    | KIF3C    | 0.900          |
| ELAVL2    | LSM7     | 0.900          |
| GRM3      | ANXA1    | 0.900          |
| SNRPG     | WDR77    | 0.900          |
| FOLR1     | DYNC2LI1 | 0.900          |
| TNFRSF12A | SHFM1    | 0.900          |
| ITGA6     | CASP7    | 0.900          |
| ARRB1     | AP1S2    | 0.900          |
| GNG5      | CACNB2   | 0.900          |
| HLA-DRA   | KIF4A    | 0.900          |
| GNG5      | VIPR2    | 0.900          |
| GABBR2    | ANXA1    | 0.900          |
| TCTN1     | TUBB4A   | 0.900          |
| ARRB1     | FN1      | 0.900          |
| PUF60     | SNRPG    | 0.900          |
| FZD6      | GNG13    | 0.900          |
| HLA-DRA   | DNM1     | 0.900          |
| KIF20A    | TMED10   | 0.900          |
| KDELR1    | ANK1     | 0.900          |
| TRIM22    | HLA-G    | 0.900          |
| UBE2C     | TRIM9    | 0.900          |
| GNG5      | PENK     | 0.900          |
| KDELR1    | FOLR1    | 0.900          |
| NEDD4L    | WSB1     | 0.900          |
| UGT8      | GLA      | 0.900          |
| HLA-A     | TRIM2    | 0.900          |
| KIF20A    | HLA-DMA  | 0.900          |
| HLA-DPA1  | AP1S2    | 0.900          |
| TCTN1     | CDK1     | 0.900          |
| CXCR7     | GNB5     | 0.900          |
| FZD6      | GNB5     | 0.900          |
| REPS2     | SYT1     | 0.900          |
| HLA-G     | VAMP8    | 0.900          |
| ANXA1     | GNG13    | 0.900          |
| CDK1      | B9D1     | 0.900          |
| MAMLD1    | HDAC1    | 0.900          |
| LPCAT4    | PPAP2A   | 0.900          |
| REPS2     | VAMP3    | 0.900          |
| COL9A2    | COL4A5   | 0.900          |
| TRIM22    | HLA-A    | 0.900          |
| CXCR7     | C5       | 0.900          |
| CD44      | TRIM22   | 0.900          |
| NPHP1     | TUBB4A   | 0.900          |
| GNB5      | C5       | 0.900          |
| SH3GL2    | KIF4A    | 0.900          |

Table SV. Continued.

| Node 1   | Node 2   | Combined_score |
|----------|----------|----------------|
| C5AR1    | PENK     | 0.900          |
| WASF1    | ELMO1    | 0.900          |
| ADRB2    | SYT1     | 0.900          |
| HLA-DPA1 | SH3GL2   | 0.900          |
| GNG5     | GRM3     | 0.900          |
| GNG5     | ADCY1    | 0.900          |
| PCNA     | NMI      | 0.900          |
| HLA-A    | VAMP8    | 0.900          |
| PENK     | APLNR    | 0.900          |
| OPRK1    | APLNR    | 0.900          |
| DNAJC6   | REPS2    | 0.900          |
| GNG12    | CACNB2   | 0.900          |
| KDELR1   | ANK3     | 0.900          |
| CDK1     | NPHP1    | 0.900          |
| HLA-DRA  | KIF3C    | 0.900          |
| HLA-B    | TRIM22   | 0.900          |
| DGKZ     | AGPAT5   | 0.900          |
| PENK     | C5       | 0.900          |
| KIF13B   | KDELR1   | 0.900          |
| PENK     | GNG13    | 0.900          |
| TF       | ATP6V1G2 | 0.900          |
| CACNB2   | GNG13    | 0.900          |
| KDELR1   | SPTBN2   | 0.900          |
| HLA-DMA  | KIF3C    | 0.900          |
| HLA-C    | VAMP3    | 0.900          |
| GABBR2   | C5       | 0.900          |
| B3GAT1   | VCAN     | 0.900          |
| PSMB9    | CCNA1    | 0.900          |
| KIF3C    | KDELR2   | 0.900          |
| HLA-G    | TRIM2    | 0.900          |
| TMED10   | KIF3C    | 0.900          |
| REPS2    | VAMP8    | 0.900          |
| SST      | C5       | 0.900          |
| GNG5     | ANXA1    | 0.900          |
| OPRK1    | C5       | 0.900          |
| TCTN1    | MAPRE1   | 0.900          |
| HLA-DPA1 | KIF4A    | 0.900          |
| HLA-B    | TRIM2    | 0.900          |
| PSMB8    | PTTG1    | 0.900          |
| TCTN3    | TUBB4A   | 0.900          |
| PENK     | ADCY1    | 0.900          |
| HLA-G    | VAMP3    | 0.900          |
| FBXL7    | NEDD4L   | 0.900          |
| RRM2     | MELK     | 0.900          |
| ADRB2    | VAMP3    | 0.900          |
| HLA-DRA  | KIF20A   | 0.900          |
| GNG12    | GRM3     | 0.900          |
| TCTN1    | CETN2    | 0.900          |
| C5AR1    | GABBR2   | 0.900          |
| KIF4A    | KDELR1   | 0.900          |
| CENPF    | PTTG1    | 0.900          |
| TRIM9    | FBXW7    | 0.900          |
| ADCY1    | ANXA1    | 0.900          |
| VAMP8    | GNS      | 0.900          |
| CCNA1    | NMI      | 0.900          |
| GNG12    | ADCY1    | 0.900          |
| ANK1     | KDELR2   | 0.900          |
| C5AR1    | GNB5     | 0.900          |
| HLA-DMA  | DYNC2LI1 | 0.900          |

Table SV. Continued.

| Node 1   | Node 2   | Combined_score |
|----------|----------|----------------|
| ARRB1    | CNKS2R2  | 0.900          |
| MAMLD1   | HES1     | 0.900          |
| COL4A1   | COL9A2   | 0.900          |
| VIPR2    | GNG13    | 0.900          |
| PRKAR1B  | FN1      | 0.900          |
| COL6A2   | PLOD3    | 0.900          |
| HOXB3    | POLR2G   | 0.900          |
| VAMP2    | GNS      | 0.900          |
| SPTBN2   | TMED10   | 0.900          |
| SOX2     | POLR2G   | 0.900          |
| GNG5     | C5       | 0.900          |
| PMF1     | NUP107   | 0.900          |
| GNG5     | LPAR6    | 0.900          |
| EDNRA    | ADCY1    | 0.900          |
| LAMC1    | ARHGEF6  | 0.900          |
| TRIM9    | WSB1     | 0.900          |
| HOMER1   | NRXN2    | 0.900          |
| PENK     | ANXA1    | 0.900          |
| GRM3     | GNG13    | 0.900          |
| VAMP2    | ADRB2    | 0.900          |
| GNG12    | PENK     | 0.900          |
| ARRB1    | GNS      | 0.900          |
| HLA-DRA  | DYNC2LI1 | 0.900          |
| MAMLD1   | NOTCH2   | 0.900          |
| GNG13    | C5       | 0.900          |
| LAMB2    | ARHGEF6  | 0.900          |
| FOLR1    | ANK3     | 0.900          |
| ANXA1    | APLNR    | 0.900          |
| TMED10   | ANK1     | 0.900          |
| APLNR    | C5       | 0.900          |
| GPC4     | LRP10    | 0.900          |
| HLA-DRA  | TRIM2    | 0.900          |
| KDELR1   | DYNC2LI1 | 0.900          |
| DNAJC6   | GNS      | 0.900          |
| PMF1     | MAPRE1   | 0.900          |
| HECW1    | SHFM1    | 0.900          |
| CACNA1B  | CACNB2   | 0.899          |
| CENPF    | TPX2     | 0.897          |
| RRM2     | MCM2     | 0.897          |
| TPX2     | BUB1B    | 0.897          |
| CD44     | LAMB2    | 0.895          |
| CACNA1B  | GNB5     | 0.894          |
| CDK4     | CCNA1    | 0.894          |
| RRM2     | TPX2     | 0.893          |
| CDH2     | VIM      | 0.892          |
| NRAS     | PLCE1    | 0.892          |
| KIF20A   | BUB1B    | 0.892          |
| TTK      | CENPF    | 0.891          |
| KIF20A   | PTTG1    | 0.891          |
| CD44     | COL1A2   | 0.890          |
| KIF4A    | BUB1B    | 0.889          |
| CACNA1B  | GNAO1    | 0.888          |
| KIF20A   | MELK     | 0.888          |
| CD44     | IQGAP1   | 0.888          |
| CPLX2    | SNAP25   | 0.887          |
| KIAA0101 | MELK     | 0.887          |
| FOXM1    | TPX2     | 0.886          |
| KIF4A    | CCNB1    | 0.886          |
| PDIA4    | SEC61A1  | 0.886          |

Table SV. Continued.

| Node 1  | Node 2   | Combined_score |
|---------|----------|----------------|
| SCN1A   | SCN2A    | 0.885          |
| ABCA1   | PLTP     | 0.885          |
| KIF20A  | TTK      | 0.884          |
| CENPF   | MELK     | 0.884          |
| UBE2C   | KIAA0101 | 0.884          |
| GABRG2  | EFHC1    | 0.884          |
| KIT     | VEGFC    | 0.883          |
| MELK    | BUB1B    | 0.882          |
| ITGA7   | ITGB4    | 0.881          |
| CAMK2B  | RYR2     | 0.881          |
| CAMK4   | ATF1     | 0.881          |
| MCM2    | CCNB1    | 0.881          |
| S100A11 | ANXA1    | 0.880          |
| MAPK7   | PTPRR    | 0.880          |
| TPX2    | KIAA0101 | 0.878          |
| PRKCB   | GNAO1    | 0.877          |
| HSD17B6 | DECR1    | 0.877          |
| CENPF   | UBE2C    | 0.876          |
| TMEM231 | B9D1     | 0.875          |
| CD44    | MSN      | 0.874          |
| TTK     | MELK     | 0.874          |
| RRM2    | KIAA0101 | 0.874          |
| PTTG1   | MELK     | 0.874          |
| TTK     | CKS1B    | 0.873          |
| ZWINT   | KIAA0101 | 0.873          |
| PCNA    | DAD1     | 0.872          |
| RAPGEF4 | RYR2     | 0.872          |
| STT3A   | SEC61A1  | 0.871          |
| FGF12   | KDR      | 0.871          |
| KIF20A  | UBE2C    | 0.871          |
| RRM2    | PTTG1    | 0.871          |
| RIMS2   | PCLO     | 0.871          |
| PCLO    | RAB3A    | 0.870          |
| RRM2    | UBE2C    | 0.869          |
| STX18   | VAMP3    | 0.869          |
| MCM2    | CDK4     | 0.869          |
| CD44    | EZR      | 0.868          |
| DERA    | ENO2     | 0.868          |
| FZD6    | VANGL1   | 0.867          |
| MYC     | ABL1     | 0.867          |
| PTTG1   | KIAA0101 | 0.866          |
| RRM2    | BUB1B    | 0.866          |
| KIF20A  | RRM2     | 0.866          |
| TTK     | TPX2     | 0.865          |
| UBE2C   | MELK     | 0.865          |
| TYMS    | KIAA0101 | 0.864          |
| CDK1    | RAD51AP1 | 0.863          |
| FOS     | PRKCB    | 0.862          |
| TTK     | PTTG1    | 0.861          |
| ANXA2   | LGALS1   | 0.861          |
| SCP2    | FDX1     | 0.861          |
| ITGA6   | FN1      | 0.861          |
| FOS     | CCL4     | 0.860          |
| PTTG1   | TYMS     | 0.860          |
| BDNF    | FOS      | 0.859          |
| HLA-DRA | VIM      | 0.858          |
| VAMP2   | STX18    | 0.858          |
| PRMT3   | PRMT5    | 0.858          |
| DAD1    | SEC61A1  | 0.857          |

Table SV. Continued.

| Node 1   | Node 2    | Combined_score |
|----------|-----------|----------------|
| TTK      | UBE2C     | 0.855          |
| UNC13A   | RIMS1     | 0.855          |
| CD44     | LAMA1     | 0.854          |
| KIAA0101 | CCNB1     | 0.854          |
| ZWINT    | UBE2C     | 0.853          |
| TMEM231  | TCTN1     | 0.852          |
| GANAB    | P4HB      | 0.852          |
| RYR2     | PPP2R3A   | 0.852          |
| ITGA6    | TNC       | 0.852          |
| P4HB     | RCN1      | 0.851          |
| CACNA1B  | RYR2      | 0.851          |
| UBE2C    | FOXM1     | 0.850          |
| MELK     | RAD51AP1  | 0.850          |
| ITGA7    | COL4A2    | 0.850          |
| ZWINT    | RRM2      | 0.848          |
| TTK      | RAD51AP1  | 0.848          |
| PLCB4    | PRKCB     | 0.848          |
| PLCD1    | PRKCB     | 0.848          |
| ITGA7    | FN1       | 0.847          |
| GAD1     | PVALB     | 0.846          |
| STX18    | SNAP25    | 0.846          |
| TJP1     | NOTCH2    | 0.846          |
| LAMA2    | CD44      | 0.845          |
| UNC13A   | BSN       | 0.845          |
| PRKCB    | PLCE1     | 0.845          |
| GABRG2   | GABARAPL1 | 0.844          |
| ITGA7    | COL6A2    | 0.844          |
| HS2ST1   | GLCE      | 0.844          |
| HSD17B8  | HSD17B6   | 0.844          |
| ITPR1    | ANK1      | 0.844          |
| TYMS     | MELK      | 0.843          |
| FGF14    | KDR       | 0.843          |
| DNAJC10  | SEC61A1   | 0.843          |
| STMN4    | TUBA4A    | 0.843          |
| ITGA6    | COL1A1    | 0.843          |
| FN1      | ITGB4     | 0.841          |
| ZWINT    | MELK      | 0.841          |
| GNAO1    | GABBR2    | 0.841          |
| KCNJ9    | GNAO1     | 0.841          |
| SIGMAR1  | LBR       | 0.840          |
| CENPF    | KIAA0101  | 0.839          |
| FGF14    | KIT       | 0.838          |
| FGF12    | KIT       | 0.837          |
| KIF5C    | GRIA2     | 0.837          |
| SCP2     | CAV1      | 0.837          |
| CD44     | COL4A5    | 0.836          |
| ZWINT    | TPX2      | 0.836          |
| FBN1     | VCAN      | 0.836          |
| STK3     | CAB39L    | 0.836          |
| CD44     | VCAN      | 0.834          |
| ITGA7    | COL1A2    | 0.833          |
| TTK      | KIAA0101  | 0.832          |
| ITGA6    | COL4A2    | 0.832          |
| CD44     | LAMC1     | 0.832          |
| RIMS1    | BSN       | 0.832          |
| CD44     | VIM       | 0.831          |
| CD44     | COL4A2    | 0.831          |
| KIF20A   | KIAA0101  | 0.831          |
| RGS3     | EFNB3     | 0.831          |

Table SV. Continued.

| Node 1     | Node 2  | Combined_score |
|------------|---------|----------------|
| FN1        | COL1A1  | 0.831          |
| COL4A2     | ITGB4   | 0.830          |
| KIAA0101   | BUB1B   | 0.830          |
| NRXN1      | SYT13   | 0.830          |
| CAMK2B     | FLNA    | 0.830          |
| KIF4A      | TTK     | 0.830          |
| CYBA       | DECR1   | 0.829          |
| TTK        | RRM2    | 0.829          |
| KCNJ6      | GNB5    | 0.828          |
| CAV1       | ITGB4   | 0.828          |
| DYNLT1     | DNALI1  | 0.828          |
| ITGA7      | COL4A1  | 0.828          |
| ITGA6      | COL4A1  | 0.827          |
| CD44       | COL4A1  | 0.827          |
| RRM2       | FOXM1   | 0.826          |
| ITGA7      | COL1A1  | 0.826          |
| CAMK2B     | FLNC    | 0.826          |
| ITGA7      | COL4A5  | 0.826          |
| COL4A5     | ITGB4   | 0.826          |
| MYC        | FBXW7   | 0.825          |
| NEDD4L     | KDR     | 0.825          |
| CAMK2B     | PLCB4   | 0.825          |
| CALR       | RCN1    | 0.825          |
| NEDD4L     | KIT     | 0.825          |
| ITGA6      | COL1A2  | 0.825          |
| PARP4      | CASP7   | 0.824          |
| BUB1B      | BARD1   | 0.824          |
| PRDX6      | DNAJC10 | 0.824          |
| PPP3CA     | RCAN2   | 0.824          |
| KCNJ6      | GNAO1   | 0.823          |
| CXCR4      | KIT     | 0.823          |
| COL1A2     | ITGB4   | 0.823          |
| KCNJ9      | GNB5    | 0.823          |
| COL1A1     | ITGB4   | 0.823          |
| COL4A1     | ITGB4   | 0.823          |
| TCF7L2     | YAP1    | 0.822          |
| SPTBN2     | SLC1A6  | 0.822          |
| KIF4A      | UBE2C   | 0.822          |
| SPAG8      | HSD17B6 | 0.822          |
| FLNC       | PAK1    | 0.821          |
| CLN5       | CLN3    | 0.821          |
| PROM1      | CD44    | 0.821          |
| DLG2       | SCRIB   | 0.820          |
| EZR        | PRKCB   | 0.820          |
| CD44       | COL6A2  | 0.820          |
| KIF4A      | FOXM1   | 0.820          |
| PRKCB      | PRKD2   | 0.820          |
| TNC        | ITGB4   | 0.819          |
| PIIB       | PDIA4   | 0.819          |
| PRDX6      | CAT     | 0.819          |
| GABRB1     | GABRB2  | 0.817          |
| UBE2C      | CKS1B   | 0.817          |
| CACNA1B    | GNG3    | 0.817          |
| ITGA6      | COL4A5  | 0.817          |
| TMED10     | PSENEN  | 0.816          |
| HOOK1      | CLN3    | 0.816          |
| SLC25A24   | SLC25A4 | 0.816          |
| ST6GALNAC2 | EEF1A2  | 0.815          |
| PPP3CA     | PLCB4   | 0.815          |

Table SV. Continued.

| Node 1    | Node 2    | Combined_score |
|-----------|-----------|----------------|
| ITGA6     | COL6A2    | 0.815          |
| MELK      | MCM2      | 0.815          |
| CYR61     | IGFBP7    | 0.815          |
| CACNA1B   | GNG13     | 0.815          |
| GOT1      | GAD1      | 0.815          |
| SLC1A1    | SLC1A6    | 0.814          |
| HIST1H4J  | HAT1      | 0.814          |
| CPLX2     | NEUROD2   | 0.814          |
| FOXM1     | BUB1B     | 0.814          |
| ENOSF1    | TYMS      | 0.814          |
| KCNJ6     | GNG13     | 0.813          |
| KCNJ9     | GNG13     | 0.813          |
| PLCL1     | GABRB2    | 0.813          |
| PRKCB     | TJP1      | 0.813          |
| PLP2      | PLP1      | 0.813          |
| PLCL1     | GABRB1    | 0.813          |
| PLCL1     | GABRB3    | 0.813          |
| ZWINT     | PTTG1     | 0.812          |
| PLCB4     | KDR       | 0.812          |
| RGL2      | NRAS      | 0.812          |
| RRM2      | RAD51AP1  | 0.812          |
| PLCB4     | KIT       | 0.812          |
| NRAS      | ARHGEF6   | 0.812          |
| HLA-DRA   | ABL1      | 0.811          |
| CAMK2B    | CACNB2    | 0.811          |
| KIF4A     | CENPF     | 0.811          |
| CACNB4    | CAMK2B    | 0.810          |
| RPH3A     | SNAP25    | 0.810          |
| PRMT8     | PRMT5     | 0.810          |
| ITGA6     | FLNA      | 0.809          |
| COL6A2    | ITGB4     | 0.809          |
| PRKCB     | ITGB4     | 0.809          |
| TCF7L2    | TEAD3     | 0.808          |
| SCN1B     | CAMK2B    | 0.808          |
| TEAD3     | TCF7L1    | 0.808          |
| CAMK2B    | ATF1      | 0.808          |
| G6PC3     | ALDOC     | 0.808          |
| PLCL1     | GABRD     | 0.807          |
| TYMS      | TPX2      | 0.807          |
| RASGRP1   | CACNG2    | 0.807          |
| GABRG2    | PLCL1     | 0.807          |
| GABARAPL1 | GABRA1    | 0.807          |
| PRKCB     | GNB5      | 0.807          |
| GABARAPL1 | GABRA4    | 0.807          |
| GABRA2    | GABARAPL1 | 0.807          |
| COL9A2    | ITGB4     | 0.806          |
| KIF20A    | FAM64A    | 0.806          |
| PDE1A     | GNG13     | 0.806          |
| PRKCB     | GNG3      | 0.806          |
| TAGLN3    | ENO2      | 0.806          |
| SCN1A     | GNAO1     | 0.806          |
| GABRB1    | GABARAPL1 | 0.805          |
| TPX2      | RAD51AP1  | 0.805          |
| FLNA      | FLNC      | 0.805          |
| KIF20A    | RAD51AP1  | 0.805          |
| SH3GL2    | KIT       | 0.805          |
| SH3GL2    | KDR       | 0.805          |
| GABRB3    | GABRB1    | 0.805          |
| GABRB3    | GABRB2    | 0.805          |

Table SV. Continued.

| Node 1  | Node 2    | Combined_score |
|---------|-----------|----------------|
| SV2B    | LAMB2     | 0.805          |
| CD44    | CXCR4     | 0.805          |
| GABRB2  | GABARAPL1 | 0.804          |
| GABRB3  | GABARAPL1 | 0.804          |
| TSPO    | SLC25A4   | 0.804          |
| CENPF   | RRM2      | 0.804          |
| CACNA1B | GNG5      | 0.804          |
| TTK     | TYMS      | 0.804          |
| ITGA6   | FLNC      | 0.803          |
| BDNF    | SYN1      | 0.803          |
| ITGA7   | FLNA      | 0.803          |
| UGT8    | AGA       | 0.803          |
| PLCL1   | GABRA2    | 0.803          |
| PLCL1   | GABRA4    | 0.803          |
| LAMA1   | SV2B      | 0.802          |
| NSDHL   | LBR       | 0.802          |
| GABRD   | GABARAPL1 | 0.802          |
| PCNA    | CKS1B     | 0.802          |
| KDELRL1 | RCN1      | 0.802          |
| CACNB4  | RASGRP1   | 0.802          |
| ITGA7   | FLNC      | 0.802          |
| GNG12   | PAK6      | 0.802          |
| PRKD2   | ATF1      | 0.802          |
| SV2B    | LAMC1     | 0.802          |
| CACNA1B | RASGRP1   | 0.802          |
| FKBP1B  | ENO2      | 0.802          |
| CACNA1B | GNG12     | 0.802          |
| LAMA2   | SV2B      | 0.802          |
| PRKCB   | GNG13     | 0.801          |
| CACNB2  | RASGRP1   | 0.801          |
| PLCL1   | GABRA1    | 0.801          |
| SH3GLB1 | KIT       | 0.800          |
| CACNB4  | PPP2R3A   | 0.800          |
| YAP1    | TCF7L1    | 0.800          |
| PCNA    | RNASEH2A  | 0.800          |
| TKTL1   | G6PC3     | 0.800          |
| KIF20A  | ZWINT     | 0.800          |
| GNG5    | PRKCB     | 0.800          |
| ITGA7   | COL9A2    | 0.800          |
| SCN1A   | GNB5      | 0.800          |
| GNG5    | SCN1A     | 0.800          |
| CD44    | COL9A2    | 0.800          |
| GNG12   | PAK1      | 0.800          |
| ITGA6   | COL9A2    | 0.800          |
| SCN1A   | GNG13     | 0.800          |
| CACNG2  | PPP2R3A   | 0.800          |
| GNG12   | SCN1A     | 0.800          |
| SCN1A   | GNG3      | 0.800          |
| HECW1   | SSR4      | 0.800          |
| RRM2    | PDIA6     | 0.800          |
| GNG12   | PRKCB     | 0.800          |
| DERA    | G6PC3     | 0.800          |
| GNG12   | PAK7      | 0.800          |
| SH3GLB1 | KDR       | 0.800          |
| PARD3   | PRSS3     | 0.800          |
| ARRB1   | OR10J1    | 0.800          |
| OR10J1  | GNG13     | 0.800          |
| HLA-DRA | PPFIA4    | 0.800          |
| CACNB2  | PPP2R3A   | 0.800          |



Table SV. Continued.

| Node 1   | Node 2   | Combined_score |
|----------|----------|----------------|
| EMILIN1  | ELN      | 0.798          |
| FN1      | COL1A2   | 0.798          |
| NSDHL    | SIGMAR1  | 0.798          |
| PRDX6    | P4HB     | 0.798          |
| ABL1     | FOS      | 0.797          |
| CYR61    | CTGF     | 0.796          |
| SMC4     | MCM2     | 0.796          |
| KIF4A    | RRM2     | 0.795          |
| TYMS     | CCNB1    | 0.795          |
| PCNA     | ANXA2    | 0.794          |
| GAD1     | AGXT2L1  | 0.794          |
| TTK      | FOXMI    | 0.793          |
| MCM2     | HAT1     | 0.793          |
| PTTG1    | CKS1B    | 0.793          |
| PALLD    | EZR      | 0.792          |
| BUB1B    | RAD51AP1 | 0.792          |
| SPEF1    | MAPRE1   | 0.792          |
| CTGF     | IGFBP7   | 0.792          |
| RUVBL1   | ACTL6B   | 0.791          |
| C5       | WFDC1    | 0.791          |
| TCF7L1   | AES      | 0.791          |
| CCL2     | DECR1    | 0.791          |
| ZWINT    | HNRNPF   | 0.790          |
| CDK1     | VIM      | 0.790          |
| SST      | PVALB    | 0.790          |
| PRSS3    | ZMYND10  | 0.790          |
| DDX60    | ISG15    | 0.789          |
| FBXW7    | CCNB1    | 0.789          |
| MYC      | SOX2     | 0.789          |
| TPX2     | MCM2     | 0.788          |
| AZIN1    | ARG2     | 0.788          |
| MCM2     | RNASEH2A | 0.787          |
| KIAA0101 | RAD51AP1 | 0.787          |
| FOXMI    | FAM64A   | 0.787          |
| PROM1    | KDR      | 0.786          |
| SGPL1    | AGXT2L1  | 0.785          |
| CALR     | PDIA6    | 0.784          |
| LBR      | EIF4A3   | 0.784          |
| MAMLD1   | MTM1     | 0.783          |
| MYC      | KIT      | 0.783          |
| RYR2     | CACNB2   | 0.783          |
| KIF20A   | TYMS     | 0.783          |
| QKI      | ELAVL4   | 0.782          |
| CYR61    | ZWINT    | 0.782          |
| PRDX6    | PDIA6    | 0.782          |
| FOS      | SST      | 0.781          |
| FBLN1    | VCAN     | 0.781          |
| ZWINT    | RCN1     | 0.781          |
| UBE2C    | YAP1     | 0.781          |
| FAS      | ANXA5    | 0.780          |
| FKBP1B   | TAGLN3   | 0.780          |
| STXBP1   | RAB3A    | 0.779          |
| QKI      | ELAVL3   | 0.779          |
| ABL1     | YAP1     | 0.779          |
| TAGLN2   | TAGLN3   | 0.779          |
| CAV1     | KDR      | 0.778          |
| SV2A     | SYT1     | 0.777          |
| GAD1     | CALB2    | 0.777          |
| TPX2     | FAM64A   | 0.777          |

Table SV. Continued.

| Node 1   | Node 2   | Combined_score |
|----------|----------|----------------|
| DYNLT1   | DNAH9    | 0.776          |
| CDYL     | ACOX2    | 0.775          |
| FOXMI    | MCM2     | 0.775          |
| ELAVL2   | QKI      | 0.775          |
| ZWINT    | RAD51AP1 | 0.775          |
| UBE2C    | TRIP6    | 0.774          |
| SMC4     | BUB1B    | 0.774          |
| PSAT1    | KIAA1598 | 0.774          |
| ZWINT    | TTK      | 0.774          |
| TF       | MIS12    | 0.774          |
| TMEM123  | DNAJC6   | 0.774          |
| BDNF     | SLC12A5  | 0.774          |
| PPP4R1   | ANXA5    | 0.774          |
| PTTG1    | DECR1    | 0.774          |
| MAPT     | SNCA     | 0.771          |
| KIF20A   | SMC4     | 0.769          |
| TTK      | MCM2     | 0.769          |
| RRM2     | CKS1B    | 0.769          |
| KIF4A    | PTTG1    | 0.768          |
| CACNB4   | EFHC1    | 0.768          |
| CPLX2    | VAMP8    | 0.768          |
| CACNA1B  | OLFM1    | 0.766          |
| CDK1     | MYC      | 0.766          |
| PCNA     | ABL1     | 0.766          |
| UNC13A   | STX1A    | 0.765          |
| CDK1     | FAM64A   | 0.765          |
| MAPK7    | FOS      | 0.764          |
| PRDX6    | PDIA4    | 0.764          |
| MSN      | PPP1R16B | 0.763          |
| IFI44L   | GBP1     | 0.763          |
| KIT      | CD9      | 0.763          |
| CPLX2    | VAMP3    | 0.763          |
| DYNLT1   | DYNC2LI1 | 0.762          |
| KIF4A    | RAD51AP1 | 0.762          |
| FAT4     | PKP4     | 0.762          |
| NR4A2    | FOS      | 0.762          |
| PCNA     | HDAC1    | 0.762          |
| KIF4A    | KIAA0101 | 0.760          |
| KDELR1   | SEC61A1  | 0.760          |
| TUBB4A   | GNB5     | 0.759          |
| RGL2     | HSD17B8  | 0.759          |
| UNC13A   | STXBP1   | 0.758          |
| RIMS1    | ELOVL4   | 0.758          |
| TTK      | FAM64A   | 0.758          |
| EMP2     | IMPDH2   | 0.758          |
| CPLX2    | NUP107   | 0.758          |
| SOX2     | VIM      | 0.758          |
| ANXA2    | S100A11  | 0.758          |
| ZWINT    | MCM2     | 0.757          |
| UBE2C    | FAM64A   | 0.757          |
| CDK1     | FBXW7    | 0.757          |
| ZWINT    | FOXMI    | 0.756          |
| SULT4A1  | RIT2     | 0.755          |
| MYC      | MAPK7    | 0.755          |
| IFT27    | RAB3A    | 0.755          |
| DALRD3   | IMPDH2   | 0.755          |
| HIST1H4J | PRMT5    | 0.754          |
| CDK1     | TACC3    | 0.754          |
| CENPF    | TYMS     | 0.754          |

Table SV. Continued.

| Node 1  | Node 2   | Combined_score |
|---------|----------|----------------|
| STXBP1  | SYT1     | 0.754          |
| EXT2    | NDST3    | 0.753          |
| PPP4R1  | PPP3CA   | 0.752          |
| MAPRE1  | DNAH9    | 0.752          |
| MFAP2   | BGN      | 0.752          |
| FOXMI   | RAD51AP1 | 0.751          |
| PPP3CA  | PVALB    | 0.751          |
| TYMS    | CKS1B    | 0.751          |
| TYMS    | RNASEH2A | 0.751          |
| SPAG8   | HSD11B1  | 0.749          |
| PCNA    | ZWINT    | 0.749          |
| RRM2    | ODC1     | 0.749          |
| MEST    | SLC22A4  | 0.749          |
| DDX60   | GBP1     | 0.748          |
| FOS     | ODC1     | 0.748          |
| PTTG1   | FOXMI    | 0.747          |
| SV2B    | SYT1     | 0.746          |
| FBLN2   | VCAN     | 0.745          |
| ZWINT   | TYMS     | 0.745          |
| PCNA    | SMC4     | 0.745          |
| SOX2    | NEUROD1  | 0.745          |
| P4HB    | PDIA4    | 0.744          |
| PPP4R1  | PPP2R3A  | 0.744          |
| HS2ST1  | NDST3    | 0.744          |
| CACNB4  | RYR2     | 0.744          |
| DDX60   | TRIM22   | 0.743          |
| PTTG1   | RNASEH2A | 0.743          |
| ENO2    | VIM      | 0.743          |
| MYC     | HIST1H4J | 0.742          |
| GPX7    | CAT      | 0.742          |
| LAMA2   | COL6A2   | 0.741          |
| GABRG2  | SCN1A    | 0.741          |
| CD44    | TIMP1    | 0.740          |
| TF      | VIM      | 0.740          |
| ALDH7A1 | AGXT2L1  | 0.739          |
| VANGL1  | CELSR3   | 0.739          |
| KIF20A  | MCM2     | 0.739          |
| GABRD   | GLRB     | 0.739          |
| ALDH9A1 | AGXT2L1  | 0.739          |
| ALDH7A1 | DECR1    | 0.738          |
| HOMER1  | ITPR1    | 0.738          |
| AGXT2L1 | ALDH8A1  | 0.737          |
| CENPF   | FAM64A   | 0.737          |
| FBLN1   | ELN      | 0.737          |
| ALDH1A1 | AGXT2L1  | 0.737          |
| CTGF    | COL1A1   | 0.736          |
| CTGF    | FN1      | 0.735          |
| PPP3CA  | CALB2    | 0.735          |
| GABRB1  | GLRB     | 0.735          |
| TRIM22  | IFI44L   | 0.735          |
| FLNA    | CAV1     | 0.735          |
| PROM1   | SOX2     | 0.735          |
| SMC4    | RAD51AP1 | 0.735          |
| GABRD   | EFHC1    | 0.734          |
| GABRG2  | SCN1B    | 0.734          |
| VSNL1   | KCNC1    | 0.734          |
| SLC1A2  | PAMR1    | 0.734          |
| FKBP1B  | CACNA1B  | 0.734          |
| CDK5R1  | CDK4     | 0.734          |

Table SV. Continued.

| Node 1   | Node 2    | Combined_score |
|----------|-----------|----------------|
| TMED10   | SEC11A    | 0.733          |
| CD63     | TIMP1     | 0.733          |
| UBE2C    | MCM2      | 0.733          |
| UNC13A   | SYT1      | 0.733          |
| PARD3    | BAZ1A     | 0.733          |
| FBLN2    | ELN       | 0.732          |
| GABRB2   | GLRB      | 0.732          |
| SMC4     | MELK      | 0.732          |
| ANXA2    | CAV1      | 0.731          |
| FKBP1B   | CACNB2    | 0.731          |
| ACTL6A   | PCNA      | 0.730          |
| PPP3CA   | EFCAB2    | 0.730          |
| HLF      | AES       | 0.730          |
| PPP3CA   | CABP1     | 0.730          |
| B4GALNT1 | GALNT10   | 0.729          |
| STXBP1   | KCNQ2     | 0.729          |
| ABL1     | CAV1      | 0.728          |
| PTTG1    | MCM2      | 0.728          |
| FOXMI    | KIAA0101  | 0.728          |
| CACNB4   | FKBP1B    | 0.728          |
| PLCE1    | MPV17     | 0.727          |
| COL4A1   | NID1      | 0.727          |
| TCF7L2   | AES       | 0.727          |
| PPIC     | LGALS3BP  | 0.726          |
| STXBP1   | VAMP3     | 0.726          |
| CACNB4   | CACNB2    | 0.725          |
| PCNA     | PTTG1     | 0.725          |
| MYC      | HDAC1     | 0.725          |
| MYC      | CAV1      | 0.725          |
| UBE2C    | CBX7      | 0.724          |
| CTGF     | CCL2      | 0.723          |
| HPCA     | KCNC1     | 0.723          |
| FKBP1B   | CACNG2    | 0.723          |
| SCN8A    | PVALB     | 0.723          |
| HIST1H4J | PRMT3     | 0.723          |
| ACTL6A   | ACTL6B    | 0.722          |
| GMPR     | DECR1     | 0.722          |
| RYR2     | CACNG2    | 0.722          |
| LRBA     | GABARAPL1 | 0.722          |
| ISG15    | GBP1      | 0.721          |
| UNC13A   | RAB3A     | 0.721          |
| EMILIN1  | MFAP2     | 0.721          |
| ABL1     | MAPT      | 0.721          |
| CACNA1B  | SCN2A     | 0.721          |
| FBN1     | COL3A1    | 0.721          |
| NAIP     | HPCA      | 0.721          |
| BUB1B    | CBX7      | 0.720          |
| BARD1    | CBX7      | 0.720          |
| INA      | DLGAP1    | 0.720          |
| RRM2     | SMC4      | 0.719          |
| TRIM9    | SNAP25    | 0.719          |
| ELN      | TIMP1     | 0.719          |
| CCNB1    | RAD51AP1  | 0.719          |
| PCNA     | MYC       | 0.718          |
| VCAN     | CCL2      | 0.718          |
| MYC      | CDH2      | 0.717          |
| CAT      | HSPE1     | 0.716          |
| DNALI1   | DNAH9     | 0.716          |
| DNAH9    | DYNC2LI1  | 0.716          |

Table SV. Continued.

| Node 1  | Node 2   | Combined_score |
|---------|----------|----------------|
| CALB2   | SST      | 0.716          |
| BGN     | ELN      | 0.716          |
| FOS     | EGR2     | 0.716          |
| PROM1   | KIT      | 0.715          |
| PEG3    | MEST     | 0.715          |
| GABRB3  | GLRB     | 0.714          |
| KCND2   | VSNL1    | 0.713          |
| CD44    | KIT      | 0.713          |
| CACNA1B | SCN1A    | 0.712          |
| TYMS    | BUB1B    | 0.711          |
| SUCLG2  | IMPDH2   | 0.711          |
| MYC     | ANXA5    | 0.710          |
| BDNF    | CALB2    | 0.710          |
| CADPS   | VSNL1    | 0.710          |
| PCNA    | HAT1     | 0.710          |
| HSD17B6 | CAT      | 0.708          |
| PDLIM1  | ELN      | 0.708          |
| RAB40B  | TIMP2    | 0.706          |
| CLIC1   | DECR1    | 0.706          |
| KIF4A   | ZWINT    | 0.706          |
| INA     | NEFM     | 0.706          |
| BCAS1   | QKI      | 0.705          |
| DNALI1  | DYNC2LI1 | 0.704          |
| SCN1A   | PVALB    | 0.703          |
| ANXA5   | LGALS1   | 0.703          |
| TACC3   | TPX2     | 0.703          |
| CENPF   | RAD51AP1 | 0.703          |
| CAMK2B  | CABP1    | 0.702          |
| MELK    | FAM64A   | 0.702          |
| PROM1   | ALDH1A1  | 0.702          |
| FBN1    | LOX      | 0.702          |
| WEE1    | CKS1B    | 0.701          |
| CAT     | ODC1     | 0.701          |
| PROM1   | CXCR4    | 0.701          |
| BDNF    | SLC17A7  | 0.701          |
| SOX2    | CDH2     | 0.701          |
| HLA-C   | CNNM1    | 0.700          |
| FOS     | CAMK4    | 0.700          |
| UNC13A  | SNAP25   | 0.700          |
| PCNA    | MELK     | 0.700          |
| RRM2    | RNASEH2A | 0.700          |

Table SVI. Characteristics of hub genes in the protein-protein interaction network according to Degree and Betweenness.

| Gene         | Gene description                   | Expression | Degree | Betweenness score |
|--------------|------------------------------------|------------|--------|-------------------|
| <i>CDK1</i>  | Cyclin dependent kinase 1          | Up         | 48     | 22558.62579       |
| <i>CD44</i>  | CD44 antigen                       | Up         | 31     | 23637.23444       |
| <i>PCNA</i>  | Proliferating cell nuclear antigen | Up         | 30     | 14249.79057       |
| <i>MYC</i>   | Myelocytomatosis oncogene          | Up         | 29     | 24736.11759       |
| <i>SYT1</i>  | Synaptotagmin 1                    | Down       | 29     | 8371.00425        |
| <i>KIF4A</i> | Kinesin family member 4A           | Up         | 28     | 9911.58477        |

*CDK1*, cyclin dependent kinase 1; *CD44*, CD44 molecule (Indian blood group); *PCNA*, proliferating cell nuclear antigen; *SYT1*, synaptotagmin 1; *KIF4A*, kinesin family member 4A.

Table SVII. Top three significant Gene Ontology Biological Process and Kyoto Encyclopedia of Genes and Genomes terms of the top five modules from the protein-protein interaction network.

| Module   | Category                                     | Term                                                 | P value                                                                        | Genes                                                                          |
|----------|----------------------------------------------|------------------------------------------------------|--------------------------------------------------------------------------------|--------------------------------------------------------------------------------|
| Module 1 | KEGG                                         | hsa05032:Morphine addiction                          | 1.40x10 <sup>-7</sup>                                                          | ADCY1, ARRB1, GNG13, GNB5, GABBR2, GNG3, GNG12, GNG5                           |
|          | KEGG                                         | hsa04727:GABAergic synapse                           | 2.03x10 <sup>-6</sup>                                                          | ADCY1, GNG13, GNB5, GABBR2, GNG3, GNG12, GNG5                                  |
|          | GO_BP                                        | GO:0007268~chemical synaptic transmission            | 3.72x10 <sup>-6</sup>                                                          | SYT1, GRM3, SNAP91, PENK, OPRK1, GABBR2, SST, AMPH                             |
| Module 2 | GO_BP                                        | GO:0030574~collagen catabolic process                | 8.32x10 <sup>-17</sup>                                                         | COL4A2, COL4A1, COL3A1, COL1A2, COL6A2, COL1A1, COL5A2, COL5A1, COL4A5         |
|          | KEGG                                         | hsa04974:Protein digestion and absorption            | 1.23x10 <sup>-15</sup>                                                         | COL4A2, COL9A2, COL4A1, COL3A1, COL1A2, COL6A2, COL1A1, COL5A2, COL5A1, COL4A5 |
| GO_BP    | GO:0030198~extracellular matrix organization | 6.33x10 <sup>-15</sup>                               | COL4A2, COL9A2, COL4A1, COL3A1, COL1A2, COL6A2, COL1A1, COL5A2, COL5A1, COL4A5 |                                                                                |
| Module 3 | GO_BP                                        | GO:0000086~G2/M transition of mitotic cell cycle     | 1.82x10 <sup>-5</sup>                                                          | CETN2, TUBA4A, ODF2, TUBB4A                                                    |
|          | GO_BP                                        | GO:0060271~cilium morphogenesis                      | 0.001331506                                                                    | B9D1, TCTN3, TCTN1                                                             |
|          | KEGG                                         | hsa05130:Pathogenic Escherichia coli infection       | 0.014707803                                                                    | TUBA4A, TUBB4A                                                                 |
| Module 4 | GO_BP                                        | GO:0000398~mRNA splicing, via spliceosome            | 3.46x10 <sup>-11</sup>                                                         | POLR2G, EIF4A3, HNRNPF, SNRPD3, LSM7, ELAVL2, SNRPG                            |
|          | KEGG                                         | hsa03040:Spliceosome                                 | 6.46x10 <sup>-7</sup>                                                          | EIF4A3, SNRPD3, LSM7, PUF60, SNRPG                                             |
| GO_BP    | GO:0008380~RNA splicing                      | 3.23x10 <sup>-5</sup>                                | EIF4A3, SNRPD3, PUF60, SNRPG                                                   |                                                                                |
| Module 5 | KEGG                                         | hsa04727:GABAergic synapse                           | 3.32x10 <sup>-14</sup>                                                         | PLCL1, GABRG2, GABARAPL1, GABRA2, GABRA1, GABRB3, GABRB2, GABRB1               |
|          | GO_BP                                        | GO:0071420~cellular response to histamine            | 7.40x10 <sup>-13</sup>                                                         | GABRG2, GABRA1, GABRB3, GABRB2, GABRB1                                         |
|          | GO_BP                                        | GO:0007214~gamma-aminobutyric acid signaling pathway | 7.71x10 <sup>-11</sup>                                                         | PLCL1, GABRG2, GABRA2, GABRA1, GABRB2                                          |

GO, Gene Ontology; BP, biological process; KEGG, Kyoto encyclopedia of genes and genomes
